# Supplementary material for: Genomic and Transcriptomic Characterization of Atypical Recurrent Flank Alopecia in the Cesky Fousek
Source: MDPI journal article supplement (doi:10.3390/genes13040650), 2022-04-07
Supplement: s1 [file s1]

**Table S8:** Fisher's exact test of eleven overlapping genes from GWAS study and RNA-seq study. The overlap was found non-significant.

V1 V2

ARG2 1.039044225

HACD3 1.017925863

PAPLN 0.780319225

TPM1 0.723505465

LACTB 0.558208956

RAD51B 0.497676468

SLC25A3 0.489588717

RDH11 0.478515289

GTDC1 0.459480995

SNX1 0.3261547

TRIP4 0.311368462
