# Supplementary material for: Genomic and Transcriptomic Characterization of Atypical Recurrent Flank Alopecia in the Cesky Fousek
Source: MDPI journal article supplement (doi:10.3390/genes13040650), 2022-04-07

**Figure S2:** Manhattan and Quantile-Quantile Plot of quantitative GWAS. The top SNP p-value does not reach the significance threshold (Bonferroni correction =  $5.8 \times 10^{-7}$ ; shown as a purple line), however, there were identified many SNPs on chr8 (colored in green) in a close proximity to each other. We consider these association suggestive. Lambda value shows that stratification correction worked well.

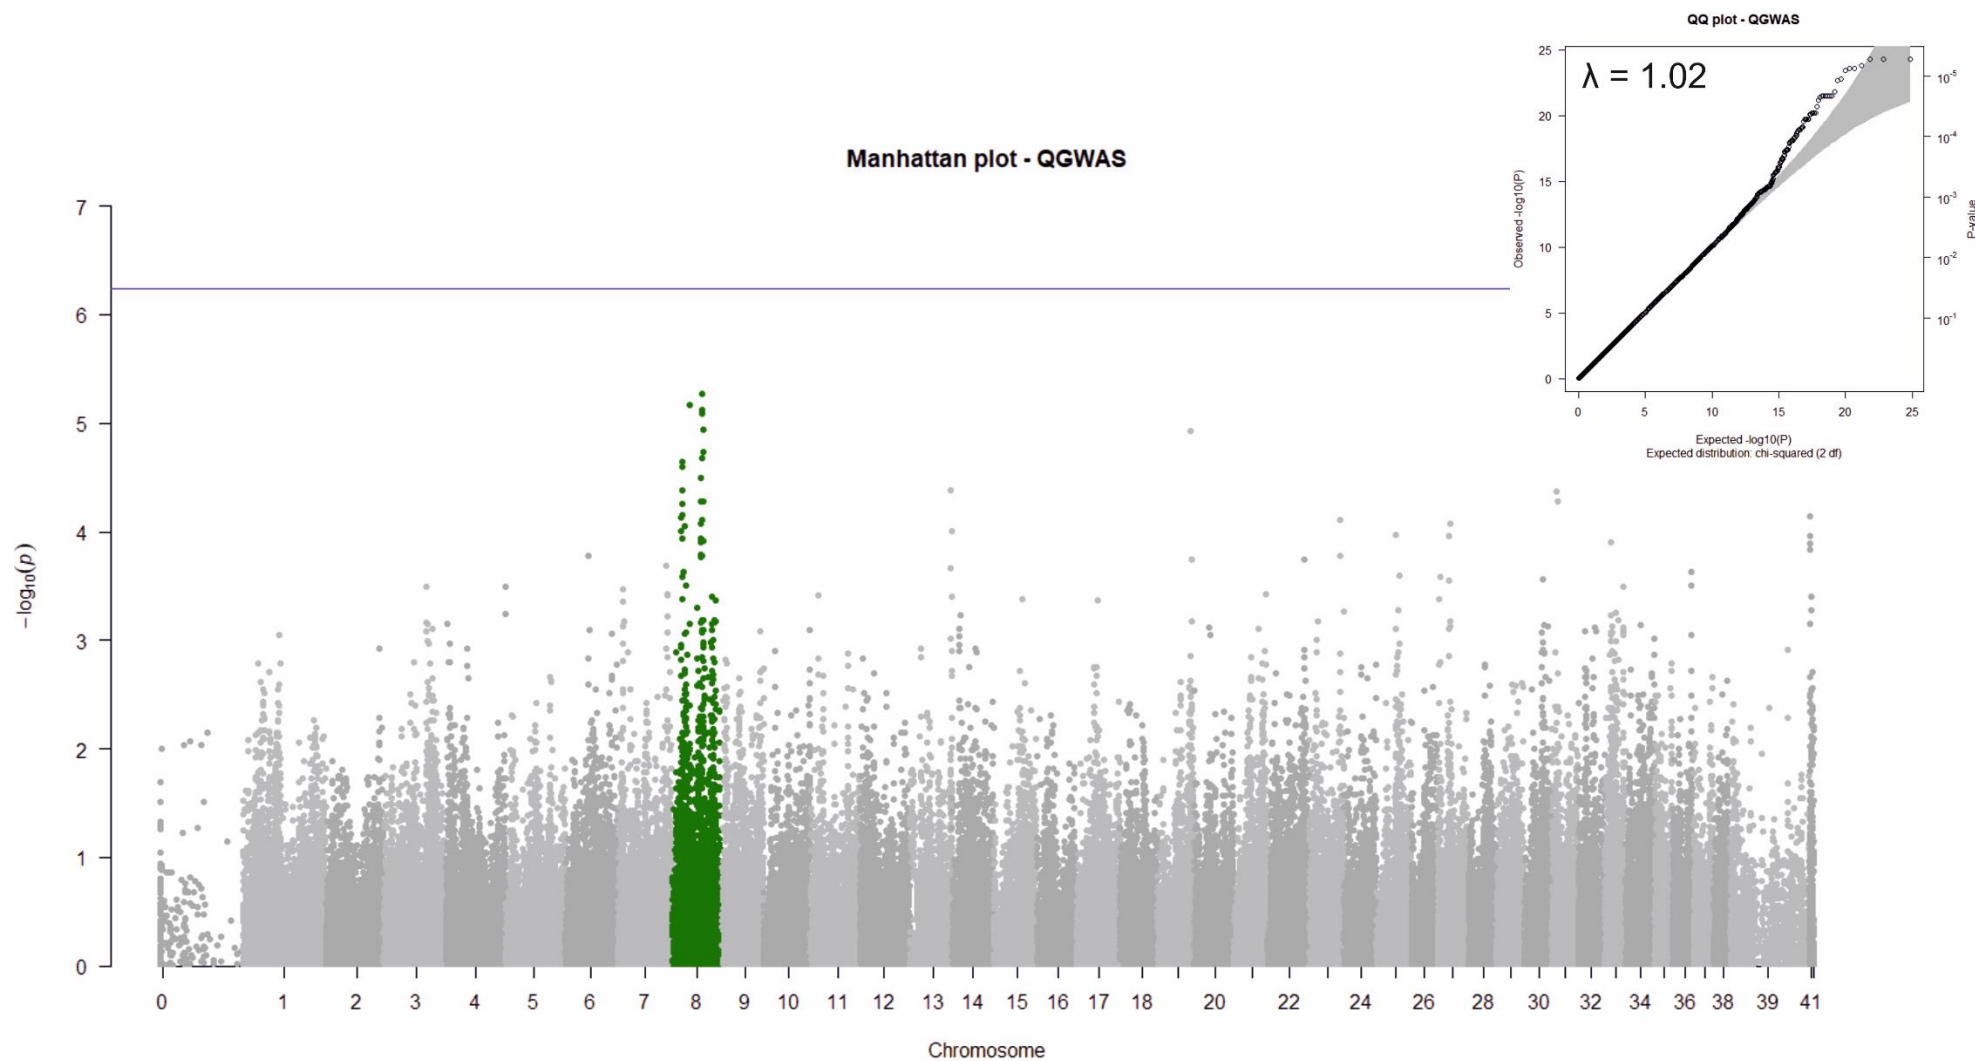

Supplement: s1 [file s1]
