# Supplementary material for: Genomic and Transcriptomic Characterization of Atypical Recurrent Flank Alopecia in the Cesky Fousek
Source: MDPI journal article supplement (doi:10.3390/genes13040650), 2022-04-07
Supplement: s1 [file s1]

**Table S2.** Summary of patient data from animals included in the study for transcriptome analysis. Animals were included or excluded from RNAsequencing analysis based on presence of consistent histological features and clinical picture.

| <b>Dog Number</b> | <b>Group</b> | <b>Age at time of biopsy</b> | <b>Sex</b> |
|-------------------|--------------|------------------------------|------------|
| B2                | Control      | 6 y 2 mo                     | F          |
| B5                | Control      | 10 y 5 mo                    | M          |
| B6                | Control      | 7 y 7 mo                     | F          |
| B12               | Control      | 7 y 9 mo                     | F          |
| B13               | Control      | 3 y 2 mo                     | F          |
| B14               | Control      | 1 y 4 mo                     | F          |
| B7                | Alopecia     | 9 y 2 mo                     | F          |
| B9                | Alopecia     | 10 y 11 mo                   | F          |
| B10               | Alopecia     | 3 y 11 mo                    | F          |
| B11               | Alopecia     | 1 y 11 mo                    | F          |
| B3                | Alopecia     | 9 y 4 mo                     | F          |
