# Supplementary material for: Genomic and Transcriptomic Characterization of Atypical Recurrent Flank Alopecia in the Cesky Fousek
Source: MDPI journal article supplement (doi:10.3390/genes13040650), 2022-04-07
Supplement: s1 [file s1]

**Table S3:** Results of one of the additional GWAS analyses for two groups of individuals - healthy individuals of age 10+ and alopecic individuals with severe affection (level 4 aRFA). The top SNP on chromosome 21 is the same SNP as in analysis of early affection (Table 5), however, the significance level is not met.

| Chr | SNP name                | Position (bp) | Allele Freq | P-value    |
|-----|-------------------------|---------------|-------------|------------|
| 21  | BICF2G630640798         | 47085771      | 0.204       | 1.28x10-06 |
| 32  | BICF2P976235            | 8550630       | 0.463       | 1.07x10-05 |
| 26  | BICF2P946509            | 33145128      | 0.093       | 1.46x10-05 |
| 1   | BICF2G630715088         | 19568314      | 0.426       | 1.77x10-05 |
| 32  | BICF2P907131            | 27577699      | 0.065       | 2.52x10-05 |
| 8   | BICF2P1386913           | 55523835      | 0.370       | 2.97x10-05 |
| 8   | BICF2S23448109          | 63200694      | 0.102       | 3.71x10-05 |
| 10  | BICF2G630476932         | 18071694      | 0.213       | 4.37x10-05 |
| 8   | chr8_59707832           | 59707832      | 0.204       | 4.40x10-05 |
| 19  | BICF2G630254010         | 49287352      | 0.259       | 4.62x10-05 |
| 26  | BICF2P1246793           | 32942963      | 0.176       | 4.72x10-05 |
| 32  | BICF2P1149618           | 10657030      | 0.296       | 5.29x10-05 |
| 32  | BICF2P213903            | 10649129      | 0.296       | 5.29x10-05 |
| 32  | TIGRP2P378950_rs8534752 | 10680407      | 0.296       | 5.29x10-05 |
| 32  | chr32_10656790          | 10656790      | 0.296       | 5.29x10-05 |
| 17  | TIGRP2P235215_rs8492674 | 54162595      | 0.426       | 5.36x10-05 |
| 39  | BICF2G630535234         | 19332927      | 0.157       | 6.38x10-05 |
| 21  | BICF2P300797            | 45020370      | 0.463       | 6.57x10-05 |
| 21  | BICF2P597850            | 45432234      | 0.194       | 7.15x10-05 |
| 10  | BICF2S23763624          | 18015742      | 0.194       | 7.24x10-05 |
