# Supplementary material for: Genomic and Transcriptomic Characterization of Atypical Recurrent Flank Alopecia in the Cesky Fousek
Source: MDPI journal article supplement (doi:10.3390/genes13040650), 2022-04-07

**Figure S3:** Manhattan and Quantile-Quantile Plot of GWAS analysis of individuals affected up to two years of age. Identified variants could have an effect on the time and/or severity of the affection. One variant can be considered significant (chr21, BICF2G630640798, raw P-value =  $5.01 \times 10^{-7}$ ), it reaches the significance threshold (Bonferroni correction =  $5.8 \times 10^{-7}$ ; shown as a purple line), and it lies in a gene ANO3. Lambda value shows that stratification correction worked well.

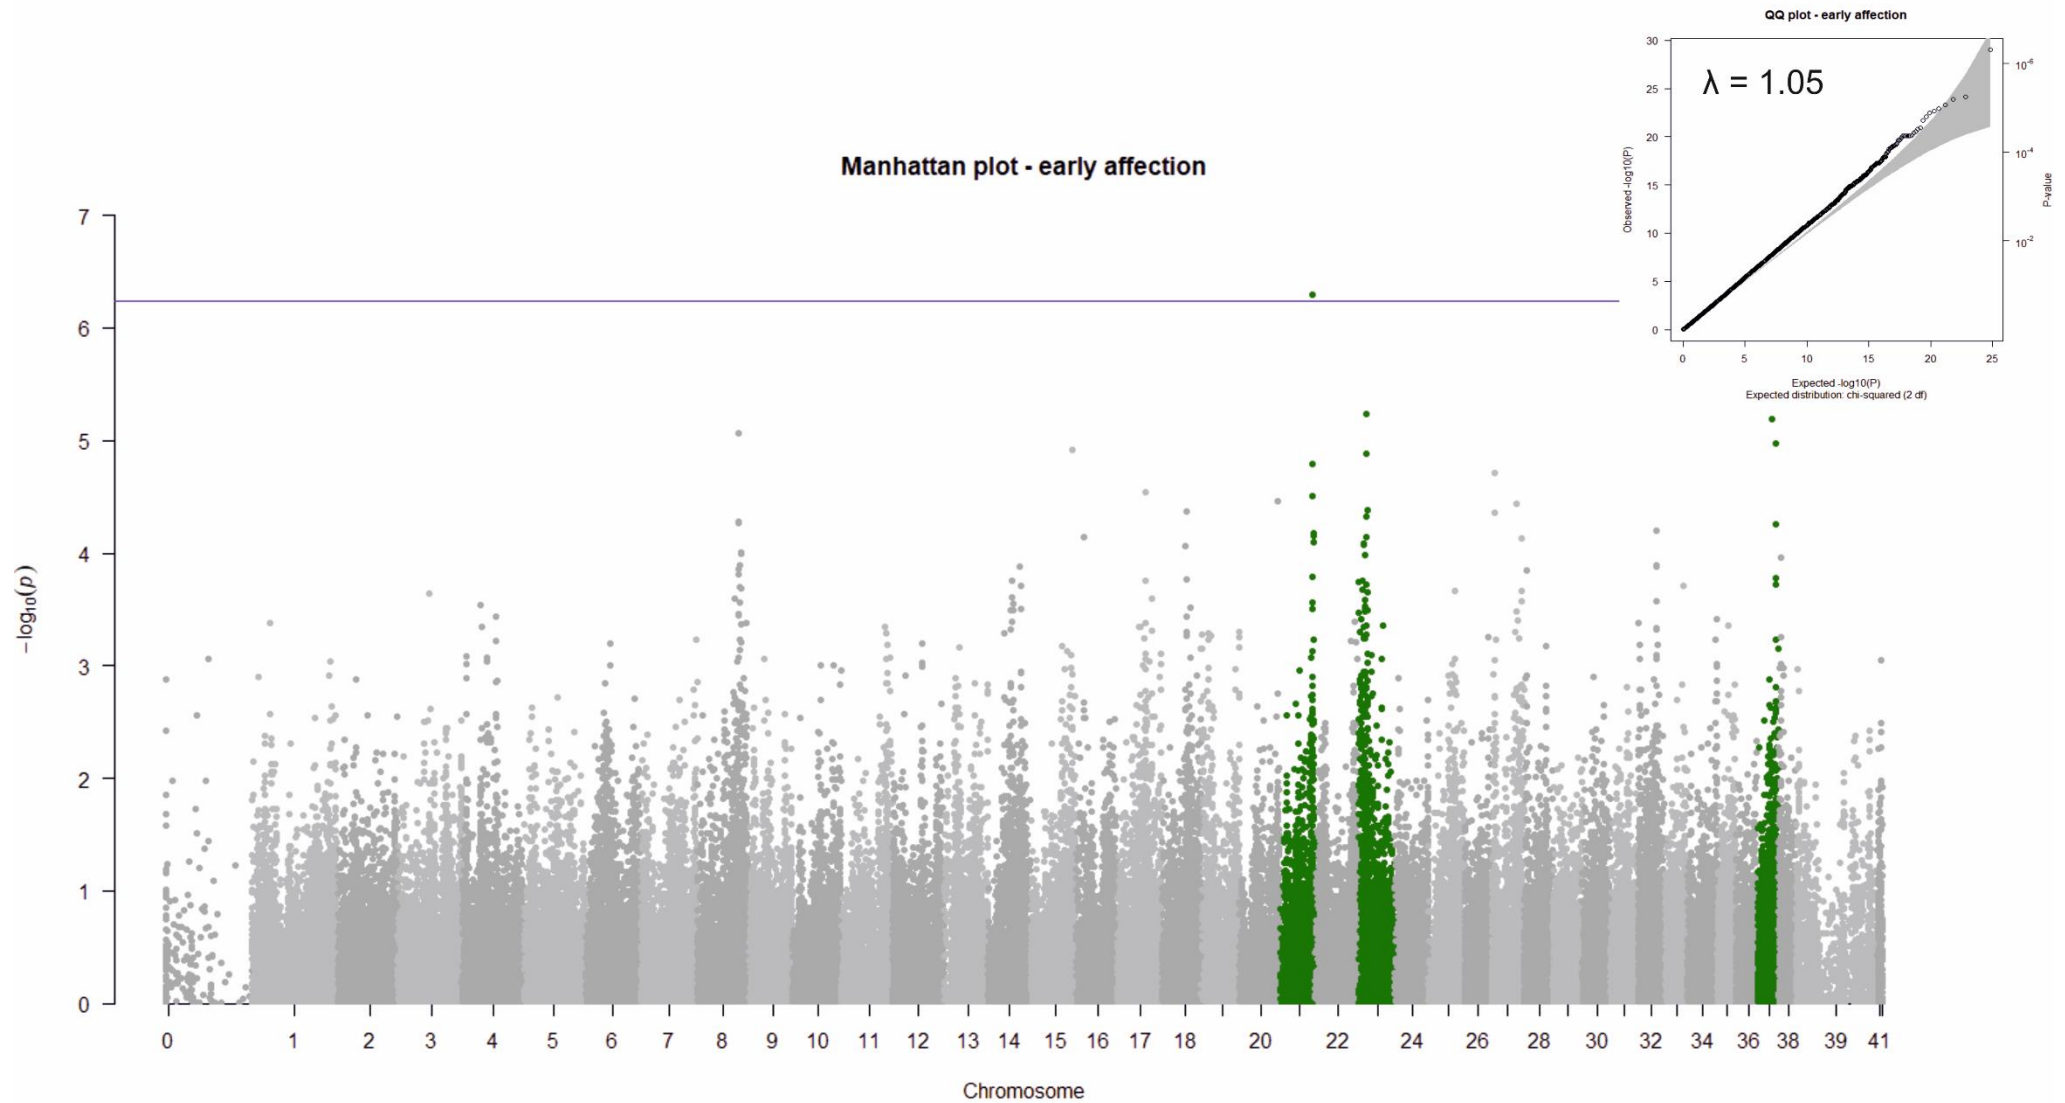

Supplement: s1 [file s1]
