# Supplementary material for: Genomic and Transcriptomic Characterization of Atypical Recurrent Flank Alopecia in the Cesky Fousek
Source: MDPI journal article supplement (doi:10.3390/genes13040650), 2022-04-07
Supplement: s1 [file s1]

**Table S6:** Top ten most relevant pathways identified using Reactome pathway analysis on downregulated genes.

| Pathway name                                                                | Entities |                       |                       |       | Reactions |                       |
|-----------------------------------------------------------------------------|----------|-----------------------|-----------------------|-------|-----------|-----------------------|
|                                                                             | found    | ratio                 | P-value               | FDR   | found     | ratio                 |
| Gap junction assembly                                                       | 10/41    | 0.003                 | 5.53x10 <sup>-4</sup> | 0.425 | 16/16     | 0.001                 |
| Extracellular matrix organization                                           | 39/329   | 0.023                 | 5.81x10 <sup>-4</sup> | 0.425 | 125/318   | 0.025                 |
| Oligomerization of connexins into connexons                                 | 3/3      | 2.08x10 <sup>-4</sup> | 0.001                 | 0.425 | 3/3       | 2.40x10 <sup>-4</sup> |
| Transport of connexins along the secretory pathway                          | 3/3      | 2.08x10 <sup>-4</sup> | 0.001                 | 0.425 | 2/2       | 1.60x10 <sup>-4</sup> |
| Gap junction trafficking and regulation                                     | 11/56    | 0.004                 | 0.002                 | 0.496 | 24/24     | 0.002                 |
| GLI proteins bind promoters of Hh responsive genes to promote transcription | 4/8      | 5.54x10 <sup>-4</sup> | 0.002                 | 0.544 | 4/4       | 3.20x10 <sup>-4</sup> |
| Gap junction trafficking                                                    | 10/52    | 0.004                 | 0.003                 | 0.653 | 20/20     | 0.002                 |
| Signaling by Hedgehog                                                       | 21/168   | 0.012                 | 0.006                 | 0.72  | 71/82     | 0.007                 |
| RHO GTPases activate PAKs                                                   | 6/27     | 0.002                 | 0.01                  | 0.72  | 14/15     | 0.001                 |
| Hedgehog 'off' state                                                        | 16/124   | 0.009                 | 0.011                 | 0.72  | 26/32     | 0.003                 |
