# Supplementary material for: Genomic and Transcriptomic Characterization of Atypical Recurrent Flank Alopecia in the Cesky Fousek
Source: MDPI journal article supplement (doi:10.3390/genes13040650), 2022-04-07
Supplement: s1 [file s1]

**Table S7:** Top thirteen most relevant pathways identified using Reactome pathway analysis on upregulated genes.

| Pathway name                                            | Entities |           |           |           | Reactions |           |
|---------------------------------------------------------|----------|-----------|-----------|-----------|-----------|-----------|
|                                                         | found    | ratio     | P-value   | FDR       | found     | ratio     |
| Activation of gene expression by SREBF (SREBP)          | 26/70    | 0.005     | 1.87x10-9 | 2.74x10-6 | 24/42     | 0.003     |
| Striated Muscle Contraction                             | 19/40    | 0.003     | 6.28x10-9 | 4.14x10-6 | 4/4       | 3.20x10-4 |
| Regulation of cholesterol biosynthesis by SREBP (SREBF) | 26/86    | 0.006     | 1.06x10-7 | 4.66x10-5 | 24/52     | 0.004     |
| Cholesterol biosynthesis                                | 19/72    | 0.005     | 3.30x10-5 | 0.011     | 27/32     | 0.003     |
| Muscle contraction                                      | 41/256   | 0.018     | 2.48x10-4 | 0.066     | 22/41     | 0.003     |
| Metabolism of steroids                                  | 47/322   | 0.022     | 6.75x10-4 | 0.149     | 87/235    | 0.019     |
| Interferon alpha/beta signaling                         | 30/184   | 0.013     | 0.001     | 0.227     | 3/20      | 0.002     |
| PPARA activates gene expression                         | 27/174   | 0.012     | 0.004     | 0.654     | 41/41     | 0.003     |
| Regulation of lipid metabolism by PPARalpha             | 27/176   | 0.012     | 0.005     | 0.67      | 42/44     | 0.004     |
| Synthesis of very long-chain fatty acyl-CoAs            | 10/51    | 0.004     | 0.016     | 0.867     | 8/12      | 9.61x10-4 |
| Class I peroxisomal membrane protein import             | 5/20     | 0.001     | 0.033     | 0.867     | 6/6       | 4.80x10-4 |
| Cholesterol biosynthesis via lathosterol                | 4/14     | 9.70x10-4 | 0.036     | 0.867     | 4/4       | 3.20x10-4 |
| Cholesterol biosynthesis via desmosterol                | 4/14     | 9.70x10-4 | 0.036     | 0.867     | 4/4       | 3.20x10-4 |
