# Supplementary material for: Genomic and Transcriptomic Characterization of Atypical Recurrent Flank Alopecia in the Cesky Fousek
Source: Genes (Basel). 2022 Apr 7;13(4):650. doi: 10.3390/genes13040650 (PMC9033119; doi:10.3390/genes13040650)
Supplement: Supplementary file 1 [file genes-13-00650-s001.zip › Table S1.xlsx]

## Sheet: List1
Table S1: List of sampled animals for GWAS study. The table contains number of samples; date of birth (DOB); information about aRFA affection (severity L2 and more ; Y/N); severity of the affection (“0” - healthy individual; “L1” – affection on ears; “L2” – affection on body sides up to 10x10 cm; “L3” – affection on body sides up to 10x25 cm, affection of body sides up to cm; “L4” – affection on …
Sample number	DOB	Dog ID	aRFA	aRFA affection severity	aRFA onset (years)	Sex	Body condition
1	2004-04-06	15618	Y	L2	8	M	O
2	2007-04-15	15619	N	0		M	JR
3	2014-04-26	15625	N	0		F	NA
4	2007-05-20	15622	N	0		F	JR
5	2007-05-20	15621	N	0		F	JR
6	2013-05-09	15623	N	0		F	JR
7	2006-10-24	15624	N	0		F	JR
8	2009-04-25	cf_8	N	0		M	O
9	2006-07-22	16165	Y	L3	2	F	JR
10	2010-03-02	16166	Y	L4	4	M	JR
11	2009-07-04	16167	Y	L2	2	F	JR
12	2007-02-23	16168	Y	L3	2	F	JR
13	2007-05-24	16169	Y	L2	7	F	O
14	2011-11-08	16170	N	0		M	O
15	2010-04-26	16171	Y	L3	3	F	JR
16	2007-04-02	16172	Y	L3	4	F	O
17	2014-03-09	16173	Y	L3	1	F	JR
18	2014-05-22	16174	N	0		F	JR
19	2006-12-28	16175	N	0		M	JR
20	2006-12-28	16176	N	0		M	JR
21	2009-01-18	16177	N	0		M	JR
22	2013-01-25	16178	N	0		M	JR
23	2010-01-03	cf_23	Y	Head	4	M	JR
24	2010-12-01	16180	N	0		M	JR
25	2012-01-28	16181	N	0		M	JR
26	2009-01-23	16182	N	0		M	JR
27	2012-05-06	16183	N	0		M	JR
28	2012-06-07	16184	N	0		M	JR
29	2007-02-20	16185	N	0		M	JR
30	2013-05-31	16186	N	0		M	NA
31	2006-11-20	cf_31	N	L1		M	NA
32	2010-05-18	cf_32	N	L1		M	JR
33	2011-04-24	16189	N	0		M	JR
34	2009-05-24	16190	N	0		F	JR
35	2009-02-17	16191	N	0		F	JR
36	2013-07-12	16192	N	0		F	O
37	2010-07-30	16193	N	0		F	JR
38	2010-12-01	cf_38	N	0		F	JR
39	2012-03-19	cf_39	N	0		F	JR
40	2012-04-13	cf_40	N	0		F	JR
41	2013-02-15	cf_41	N	0		F	JR
42	2014-08-01	cf_42	N	0		F	NA
43	2011-04-19	cf_43	N	0		M	JR
44	2006-07-19	16200	Y	L2	NA	F	JR
45	2011-06-10	cf_45	N	0		F	NA
46	2011-05-03	cf_46	N	0		F	JR
47	2014-01-07	cf_47	N	0		F	JR
48	2008-04-24	16248	N	0		M	JR
49	2014-05-06	cf_49	N	0		F	JR
50	2014-02-14	cf_50	N	0		F	JR
51	2011-03-10	cf_51	Y	L2	8	F	JR
52	2003-05-13	16252	N	0		M	O
53	2007-02-23	16253	N	0		M	JR
54	2012-03-14	cf_54	N	0		M	JR
55	2013-04-21	cf_55	N	0		F	JR
56	2011-07-21	cf_56	N	0		M	JR
57	2010-12-25	cf_57	N	0		F	JR
58	2011-01-22	cf_58	N	0		F	JR
59	2010-08-24	cf_59	N	0		M	JR
60	2006-04-08	16260	N	0		M	JR
61	2010-07-11	cf_61	N	0		M	JR
62	2015-08-09	cf_62	N	0		F	JR
63	2008-12-31	16263	N	0		M	JR
64	2008-03-07	cf_64	N	0		M	JR
65	2011-04-07	cf_65	Y	L2	8	F	JR
66	2007-05-28	16266	N	0		M	JR
67	2010-07-19	cf_67	N	0		F	JR
68	2009-08-27	16268	N	0		M	JR
69	2012-04-27	18185	Y	L2	4	F	JR
70	2008-03-06	cf_70	N	0		F	O
71	2006-09-11	18187	Y	L2	NA	F	JR
72	2014-04-28	cf_72	N	0		M	JR
73	2013-03-19	cf_73	N	0		F	JR
74	2014-03-08	cf_74	N	0		M	JR
75	2008-01-01	cf_75	N	0		F	O
76	2012-10-16	cf_76	Y	L2	6	F	JR
77	2008-01-01	18193	N	L1		M	JR
78	2014-03-09	cf_78	N	0		F	NA
79	2011-04-19	18195	Y	L2	5	F	JR
80	2007-02-03	18196	N	0		M	JR
81	2014-02-27	cf_81	N	0		F	JR
82	2010-05-15	cf_82	N	0		F	JR
83	2015-05-21	cf_83	N	0		F	JR
84	2015-03-19	cf_84	N	0		F	JR
85	2015-02-01	cf_85	N	0		M	JR
86	2011-05-01	18203	N	0		F	JR
87	2010-08-20	cf_88	N	0		F	JR
88	2007-04-25	18205	N	0		M	JR
89	2013-04-15	cf_90	N	0		M	JR
90	2012-03-10	cf_91	N	0		M	O
91	2006-01-28	18208	Y	L2	NA	F	O
92	2015-04-13	cf_93	N	0		F	JR
93	2005-07-14	18210	Y	L3	NA	F	JR
94	2008-01-03	18211	N	0		F	JR
95	2015-01-16	cf_96	N	0		F	JR
96	2007-05-11	18213	Y	L4	4	F	JR
97	2015-04-07	cf_98	N	0		M	JR
98	2005-06-14	18215	Y	L3	3	F	JR
99	2010-08-10	cf_100	N	0		F	JR
100	2013-07-27	cf_101	N	0		M	JR
101	2007-04-28	18218	Y	L2	8	F	JR
102	2004-04-16	18219	N	0		F	JR
103	2011-01-22	cf_104	N	0		F	JR
104	2014-03-24	cf_105	N	0		F	O
105	2009-04-25	18222	Y	L3	4	M	JR
106	2011-04-20	cf_107	N	0		M	NA
107	2007-02-02	cf_108	N	L1	7	M	NA
108	2003-02-15	18225	Y	L4	8	F	NA
109	2009-06-22	18226	Y	L4	5	M	O
110	2009-09-24	18227	N	0		F	JR
111	2008-09-05	cf_112	N	L1		F	JR
112	2015-05-01	cf_113	N	0		F	JR
113	2009-04-25	18230	Y	L2	6	F	JR
114	2000-04-08	6021	Y	L2	NA	F	O
115	2011-04-16	7916	Y	L4	3	F	JR
116	2009-07-13	21249	Y	L3	3	F	O
117	2014-04-10	20855	Y	L2	3	M	JR
118	2014-04-10	20856	Y	L2	2	M	JR
119	2010-09-14	21251	Y	L2	6	F	O
120	2007-09-06	21252	Y	L2	5	F	JR
121	2011-08-04	21253	Y	L2	6	F	JR
122	2010-05-18	21254	Y	L3	5	F	JR
123	2011-02-23	21255	Y	L4	6	F	O
124	2009-01-26	21256	Y	L3	4	M	O
125	2012-04-15	21257	Y	L3	5	F	O
126	2006-08-07	21258	Y	L4	3	F	JR
127	2014-04-03	21259	Y	L3	1	F	O
128	2012-04-06	21260	Y	L3	2	F	JR
129	2008-02-18	21261	Y	L4	1	F	O
130	2010-01-20	21262	Y	L3	2	F	O
131	2008-02-01	21263	Y	L3	3	M	JR
132	2010-02-20	21264	Y	L3	4	F	JR
133	2011-01-01	21265	Y	L3	6	F	JR
134	2011-09-05	21266	Y	L2	2	F	JR
135	2014-06-25	21267	Y	L3	2	F	JR
136	2005-03-03	21268	Y	L4	3	M	JR
137	2014-06-25	21269	Y	L3	1	F	O
138	2007-03-11	21270	Y	L3	5	F	JR
139	2009-03-08	21271	Y	L3	1	F	O
140	2009-04-18	21272	Y	L2	7	F	JR
141	2009-02-15	21273	Y	L3	NA	F	JR
142	2004-07-09	21274	Y	L3	8	M	JR
143	2009-07-31	21275	Y	L2	3	F	JR
144	2007-03-11	21276	Y	L2	NA	M	O
145	2005-09-15	22724	Y	L4	6	F	JR
146	2009-04-25	22722	Y	L3	4	F	JR
147	2009-07-28	cf_149	Y	Head	3	M	JR
148	2010-04-22	21410	Y	L3	3	F	O
149	2006-04-08	21412	Y	L3	2	F	O
150	2013-05-27	21413	Y	L3	4	F	JR
151	2010-03-08	23466	Y	L3	NA	F	NA
152	2010-03-22	23467	N	0		F	JR
153	2016-03-19	23468	Y	L4	2	F	JR
154	2009-03-15	23469	Y	L3	8	F	JR
155	2012-01-22	23470	Y	L3	NA	F	JR
156	2006-07-07	6592	Y	L4	2	F	JR
157	2006-07-07	6032	Y	L3	4	F	JR
158	2002-03-03	6218	N	0		F	JR
159	2001-01-21	6061	Y	L3	6	F	JR
160	2011-01-02	cf_159	Y	L3	4	F	JR
161	2010-08-24	21408	Y	L3	4	F	O
162	2014-04-06	21411	Y	L3	1	F	NA
163	2008-03-26	24725	Y	L2	4	F	O
164	2014-07-18	24726	Y	L4	1.5	F	JR
165	2015-03-19	24727	Y	L4	3	F	JR
166	2013-08-01	24728	Y	L3	5	F	JR
167	2010-04-26	cf_166	Y	L4	5	F	O
168	2010-01-03	cf_167	N	0		F	O
169	2008-12-31	cf_168	Y	L3	6	F	O
170	2014-03-01	cf_169	Y	L3	3	F	JR
171	2015-12-09	cf_170	Y	L3	1	M	JR
172	2011-12-18	cf_171	Y	L3	2	F	JR
173	2008-08-17	cf_172	Y	L3	1	F	JR
174	2010-01-03	cf_173	Y	L3	NA	F	NA
175	2007-04-06	cf_174	Y	L3	8	F	JR
176	2012-01-22	cf_175	Y	Head	3	M	JR
177	2010-05-25	cf_176	Y	L3	NA	M	NA
178	2007-05-30	cf_177	Y	L3	2	F	JR
179	2012-09-10	cf_178	Y	L3	2	F	JR
180	2006-05-06	cf_179	Y	L4	6	F	O
181	2010-05-30	cf_180	Y	L3	5	M	JR
182	2011-04-24	cf_181	Y	L4	2	F	O
183	2015-07-09	cf_182	Y	L2	3	F	JR
184	2007-07-05	cf_183	Y	L4	2	M	O
185	2009-07-18	cf_184	Y	L2	4	F	O
186	2013-01-24	cf_185	N	L1	3	F	JR
187	2010-05-18	cf_186	Y	L3	1	F	O
188	2010-05-19	cf_187	N	0		F	O
189	2017-01-26	cf_188	N	0		F	JR
190	2013-06-08	cf_189	Y	L2	4	F	O
191	2009-04-07	cf_190	Y	L4	3	F	O
192	2006-06-23	5469	N	0		F	JR
193	2014-02-27	12037	Y	L2	4	F	JR
194	2017-11-08	24805	N	0		M	JR
195	2017-08-18	22814	N	0		F	NA
196	2018-02-20	23952	N	0		M	JR
197	2018-03-19	24342	N	0		M	NA
198	2018-03-19	24344	N	0		M	NA
199	2015-03-01	14707	N	0		F	JR
200	2008-08-14	6220	N	0		F	JR
201	2015-04-03	14854	N	0		F	JR
202	2014-03-29	20151	N	0		M	NA
203	2015-11-11	18103	N	0		M	NA
204	2018-05-23	24902	N	0		F	NA
205	2016-07-07	19059	N	0		F	JR
206	2016-01-10	16427	N	0		M	JR
207	2018-03-22	24787	N	0		M	NA
208	2017-04-21	25264	N	0		M	JR
209	2005-02-15	cf_Anja	N	0		F	JR
210	2013-05-14	cf_Bo	N	0		M	JR
211	2014-05-15	cf_Brita	N	0		F	NA
212	2015-04-14	cf_Murphy	N	0		M	JR
213	2015-03-07	cf_Argo	N	0		M	JR
214	2015-06-02	cf_Rika	N	0		F	JR
215	2015-05-21	cf_Adele	N	0		F	JR
216	2015-12-31	cf_Alma	N	0		F	NA
