# Supplementary material for: Genomic and Transcriptomic Characterization of Atypical Recurrent Flank Alopecia in the Cesky Fousek
Source: Genes (Basel). 2022 Apr 7;13(4):650. doi: 10.3390/genes13040650 (PMC9033119; doi:10.3390/genes13040650)
Supplement: Supplementary file 1 [file genes-13-00650-s001.zip › Table S4.xlsx]

## Sheet: List1
Table S4: List of all genes identified by GWAS analysis and haplotype analysis. Stated is known function for each candidate gene (from www.genecards.org) and a metabolic super pathway the gene is a part of (from pathcards.genecards.org). In yellow are colored genes controlling keratin metabolism, in orange are colored genes connected to circadian rhythm.
Chromosome	Gene code	Protein	Known function	SuperPathway (highest overlap)
19	ACVR2A	Activin A Receptor Type A2	Mediator of signalling	Signalling by NODAL
19	ENSCAFT00000006550 (SLC25A3)	Solute Carrier Family 25 Member 3	Transport activity from cytosol to mitochondria	C-MYB transcription factor network
19	GTDC1	Glycosyltranferase Like Domain Containing 1	Transferase activity
19	ORC4	Origin Recognition Complex Subunit 4	DNA replication, cell cycle	CDK-mediated phosphorylation and removal of Cdc6
19	ZEB2	Zinc Finger E-Box Binding Homeobox 2	Transcriptional inhibitor	TGF-beta Receptor Signaling Pathway
19	GALNT16	Polypeptide N-Acetylgalactosaminyltransferase 16	Catalyzes the initial reaction in O-linked oligosaccharide biosynthesis, the transfer of an N-acetyl-D-galactosamine residue to a serine or threonine residue on the protein receptor	Metabolism of proteins
19	LOC100856294	rho GTPase-activating protein 20-like
19	LOC111091126	uncharacterized
19	ATP5PD	ATP Synthase Peripheral Stalk Subunit D	ATP synthesis	Respiratory electron transport, ATP synthesis by chemiosmotic coupling, and heat production by uncoupling proteins
19	PRDM5	PR/SET Domain 5	Transcription factor, cell differentiation
19	NDNF	Neuron Derived Neurotrophic Factor	Secretory protein - various cellular processes
8	ACTN1	Actinin Alpha 1	Anchors actin to a variety of intracellular structures; bundling protein	Cell junction organization
8	ADAM20	ADAM Metallopeptidase Domain 20	Involved in sperm maturation and/or fertilization	Reproduction
8	ACOT6	Acyl-CoA Thioesterase 6	Regulation of lipid metabolism	Fatty Acyl-CoA Biosynthesis
8	ADAM21	ADAM Metallopeptidase Domain 21	Fertilization, muscle development, neurogenesis	Reproduction
8	ALDH6A1	Aldehyde Dehydrogenase 6 Family Member A1	Valine and pyrimidine metabolism; binds fatty acyl-CoA	Valine degradation
8	ARG2	Arginase 2	Regulation of extra-urea cycle, regulation of immune response	CDK-mediated phosphorylation and removal of Cdc6
8	ATP6V1D	ATPase H+ Transporting V1 Subunit D	Transport processes in the vacuolar system	RET signaling
8	BBOF1	Basal Body Orientation Factor 1	Aligns and maintains cilia orientation in response to flow
8	CCDC177	Coiled-Coil Domain Containing 177
8	CCDC196	Coiled-Coil Domain Containing 196
8	COQ6	Coenzyme Q6	Mitochondrial electron transport, antioxidant	Metabolism
8	COX16	Cytochrome C Oxidase Assembly Factor	Mitochondrial respiratory chain complex	Respiratory electron transport, ATP synthesis by chemiosmotic coupling, and heat production by uncoupling proteins
8	DCAF4	DDB1 And CUL4 Associated Factor 4	Substrate receptor for ubiquitin-protein ligase complex
8	DCAF5	DDB1 And CUL4 Associated Factor 5	Substrate receptor for ubiquitin-protein ligase complex
8	DNAL1	Dynein Axonemal Light Chain 1	Generates force for cilia mobility
8	DPF3	Double PHD Fingers 3	Essential role in heart and skeletal muscle
8	EIF2S1	Eukaryotic Translation Initiation Factor 2 Subunit Alpha	Protein synthesis	Peptide chain elongation
8	ENSCAFT00000026484 (uncharacterized protein)
8	ENTPD5	Ectonucleoside Triphosphate Diphosphohydrolase 5	Metabolism of nucleotides	Purine metabolism
8	ERH	ERH MRNA Splicing And Mitosis Factor	Cell cycle; skin disease - ectodermal dysplasia
8	EXD2	Exonuclease 3' - 5' Domain Containing 2	Various cellular proceses
8	FAM161B	FAM 161 Centrosomal Protein B
8	FA71D	Golgi Associated RAB2 Interactor Family Member 2
8	FUT8	Fucosyltranferase 8	Keratin metabolism	Transport to the Golgi and subsequent modification
8	GPHN	Gephyrin	Microtubule-associated protein; plays role at inhibitory synapses	Metabolism of water-soluble vitamins and cofactors
8	HEATR4	HEAT Repeat Containing 4
8	LIN52	Lin-52 DREAM MuvB Core Complex Component	Regulation of PLK1 Activity at G2/M Transition and Cell cycle	Cell cycle, Mitotic
8	MAP3K9	Mitogen-Activated Protein Kinase Kinase Kinase 9	Cellular responses evoked by changes in the environment; signal transduction	TGF-Beta Pathway
8	MED6	Mediator Complex Subunit 6	RNA transcription, gene expression	Regulation of lipid metabolism by Peroxisome proliferator-activated receptor alpha (PPARalpha)
8	MIDEAS	Mitotic Deacetylase Associated SANT Domain Protein
8	MPP5	Membrane Palmitoylated Protein 5	Tight junction biogenesis; cell polarity in epithelial cells	Cell junction organization
8	NUMB	NUMB Endocytic Adaptor Protein	Neurogenesis	Signalling by NOTCH1
8	PAPLN	Papilin, Proteoglycan Like Sulfated Glycoprotein	Peptidase activity
8	PCNX1	Pecanex1	Developmental processes
8	PIGH	Phosphatidylinositol Glycan Anchor Biosynthesis Class H	GPI biosynthesis	Metabolism of proteins
8	PLEK2	Pleckstrin 2	Cytoskeletal arrangement
8	PLEKHD1	Pleckstrin Homology And Coiled-Coil Domain Containing D1
8	PLEKHH1	Pleckstrin Homology, MyTH4 And FERM Domain Containing H1
8	PNMA1	PNMA Family Member 1	Neuron- and testis- specific protein
8	RAD51B	RAD51 Paralog B	DNA break repair	Homologous DNA Pairing and Strand Exchange
8	PSEN1	Presenilin 1	Various cellular proceses	Innate Immune Systém
8	RBM25	RNA Binding Motif Protein 25	Regulator of alternative pre-mRNA splicing; Involved in apoptotic cell death
8	RDH11	Retinol Dehydrogenase 11	Retinal reductase	Metabolism of fat-soluble vitamins
8	RDH12	Retinol Dehydrogenase 12	Retinal reductase	Signaling by GPCR
8	RGS6	Regulator Of G Protein Signaling 6	Regulates G protein-coupled receptor signaling cascades	Chaperonin-mediated protein folding
8	RIOX1	Ribosomal Oxygenase 1	Ribosome biogenesis; central role in histone code	Chromatin regulation/Acetylation
8	SIPA1L1	Signal Induced Proliferation Associated 1 Like 1	Reorganization of actin cytoskeleton	Protein-protein interaction at synapses
8	SLC10A1	Solute Carrier Family 10 Member 1	Hepatic sodium/bile acid uptake system	Synthesis of bile acids and bile salts
8	SLC39A9	Solute Carrier Family 39 Member 9	Zinc-influx transporter	Metal ion SLC transporters
8	SLC8A3	Solute Carrier Family 8 Member A3	Member of the sodium/calcium exchanger	Cardiac conduction
8	SMOC1	SPARC Related Modular Calcium Binding 1	Essential roles in both, eye and limb development
8	SRSF5	Serine And Arginine Rich Splicing Factor 5	Plays a role in constitutive splicing	Cleavage of Growing Transcript in the Termination Region
8	SUSD6	Sushi Domain Containing 6	Growth-suppressive activity and cell death
8	SYNJ2BP	Synaptojanin 2 Binding Protein	Regulates endocytosis of activin type 2 receptor kinases; signal transduction
8	SNORD141A and B	Small Nucleolar RNA, C/D Box 141A
8	TMEM229B	Transmembrane Protein 229B
8	TTC9	Tetratricopeptide Repeat Domain 9	Cancer cell invasion and metastasis; Ichthyosis
8	VSX2	Visual System Homeobox 2	Transcriptional regulator; retinal development
8	ZFP36L1	ZFP36 Zing Finger Protein Like 1	Various cellular processes; keratin metabolism	CDK-mediated phosphorylation and removal of Cdc6
8	ZFYVE26	Zinc Finger FYVE-Type Containing 1	DNA break repair	Cytoskeletal signaling
8	ZNF410	Zinc Finger Protein 410	Activates transcription of matrix-remodeling genes such as MMP1 during fibroblast senescence
30	ADAM10	ADAM Metallopeptidase Domain 10	Cleaves many proteins	Signaling by NOTCH1
30	ALDH1A2	Aldehyde Dehydrogenase 1 Family Member A2	Vit A metabolism	Signaling by Retinoic Acid
30	ANXA2	Annexin A2	Regulation of cellular growth and in signal transduction pathways (affinity to calcium	Innate Immune Systém
30	APH1B	Aph-1 Homolog B, Gamma-Secretase Subunit	Catalyzes the intramembrane cleavage of integral proteins such as Notch receptors and APP (amyloid-beta precursor protein)	Signaling by NOTCH1
30	ANKDD1A	Ankyrin Repeat And Death Domain Containing 1A
30	AQP9	Aquaporin 9	Forms a water channel with a broad specificity; Also permeable glycerol and urea	Aquaporin-mediated transport
30	BNIP2	BCL2 Interacting Protein 2	Cell death suppression	Myogenesis
30	CA12	Carbonic Anhydrase 12	Zinc metalloenzymes that catalyze the reversible hydration of carbon dioxide	Metabolism
30	CCNB2	Cyclin B2	Essential for the control of the cell cycle at the G2/M (mitosis) transition	Mitotic Prometaphase
30	CGNL1	Cingulin Like 1	Involved in anchoring the apical junctional complex, especially tight junctions, to actin-based cytoskeletons
30	CIAO2A	Cytosolic Iron-Sulfur Assembly Component 2A	Component of the cytosolic iron-sulfur protein assembly (CIA) complex, a multiprotein complex that mediates the incorporation of iron-sulfur cluster into extramitochondrial Fe/S proteins
30	CILP	Cartilage Intermediate Layer Protein	Cartilage and joint development	RET signaling
30	CSNK1G1	Casein Kinase 1 Gamma 1	Involved in many cellular processes including DNA repair, cell division, nuclear localization and membrane transport	Nanog in Mammalian ESC Pluripotency
30	CSNK2A1	Casein Kinase 2 Alpha 1	Involved in various cellular processes, including cell cycle control, apoptosis, and circadian rhythm	Mitotic Prometaphase
30	CLPX	Caseinolytic Mitochondrial Matrix Peptidase Chaperone Subunit X	ATP-dependent protein in mitochondria; protein degradation
30	DAPK2	Death Associated Protein Kinase 2	Calcium/calmodulin-dependent serine/threonine kinase involved in multiple cellular signaling pathways that trigger cell survival, apoptosis, and autophagy	CDK-mediated phosphorylation and removal of Cdc6
30	DENND4A	DENN Domain Containing 4A	Exchange factor for guanine nucleotides	Vesicle-mediated transport
30	DPP8	Dipeptidyl Peptidase 8	May play a role in T-cell activation and immune function; inhibitor of pyroptosis
30	ENSCAFT00000025834 (MYZAP)	Myocardial Zonula Adherens Protein	Cellular signaling
30	ENSCAFT00000026921 (FBXL22)	F-Box And Leucine Rich Repeat Protein 22	Promotor of ubiquitination	Class I MHC mediated antigen processing and presentation
30	ENSCAFT00000059804 (PCLAF)	PCNA Clamp Associated Factor	Regulator of DNA repair during DNA replication	Translesion synthesis by Y family DNA polymerases bypasses lesions on DNA template
30	FAM81A	Family With Sequence Similarity 81 Member A
30	FOXB1	Forkhead Box B1
30	GCNT3	Lucosaminyl (N-Acetyl) Transferase 3, Mucin Type	Glycosyltransferase that can synthesize all known mucin beta 6 N-acetylglucosaminides	Metabolism of proteins
30	GTF2A2	General Transcription Factor IIA Subunit 2	Plays an important role in transcriptional activation	Assembly of RNA Polymerase-II Initiation Complex
30	HACD3	3-Hydroxyacyl-CoA Dehydratase 3	Catalyzator of fatty acids elongation cycle	Fatty Acyl-CoA Biosynthesis
30	HERC1	HECT And RLD Domain Containing E3 Ubiquitin Protein Ligase Family Member 1	Involved in membrane transport processes	Class I MHC mediated antigen processing and presentation
30	ICE2	Interactor Of Little Elongation Complex ELL Subunit 2	Component of the little elongation complex (LEC), a complex required to regulate small nuclear RNA (snRNA) gene transcription	Gene Expression
30	IGDCC3	Immunoglobulin Superfamily DCC Subclass Member 3
30	IGDCC4	Immunoglobulin Superfamily DCC Subclass Member 4
30	INTS14	Integrator Complex Subunit 14	RNA transcription, gene expression	Gene Expression
30	KBTBD13	Kelch Repeat And BTB Domain Containing 13	Transcription regulation, ion channel tetramerization and gating, protein ubiquitination or degradation, and cytoskeleton regulation	Class I MHC mediated antigen processing and presentation
30	LACTB	Lactamase Beta	Mitochondrial serine protease that acts as a regulator of mitochondrial lipid metabolism
30	LIPC	Lipase C, Hepatic Type	Hepatic triglyceride lipase, which is expressed in liver	Statin pathway
30	MEGF11	Multiple EGF Like Domains 11	Retina development; stress reaction (indirectly)
30	MINDY2	MINDY Lysine 48 Deubiquitinase 2	Regulatory role at the level of protein turnover
30	MTFMT	Mitochondrial Methionyl-TRNA Formyltransferase	Protein encoded by this nuclear gene localizes to the mitochondrion, where it catalyzes the formylation of methionyl-tRNA	Mitochondrial translation
30	MYO1E	Myosin IE	Myosins are actin-based motor molecules with ATPase aktivity and serve in intracellular movements	Actin Nucleation by ARP-WASP Complex
30	OAZ2	Ornithine Decarboxylase Antizyme 2	Plays a role in cell growth and proliferation by regulating intracellular polyamines	CDK-mediated phosphorylation and removal of Cdc6
30	PDCD7	Programmed Cell Death 7	Promotes apoptosis when overexpressed	mRNA Splicing - Major Pathway
30	PIF1	PIF1 5'-To-3' DNA Helicase	Required for the maintenance of both mitochondrial and nuclear genome stability; DNA-dependent adenosine triphosphate (ATP)-metabolizing enzyme; Pathway s TIMELESS (circadian rhythm)
30	PLEKHO2	Pleckstrin Homology Domain Containing O2		Innate Immune Systém
30	RAB11A	RAB11A, Member RAS Oncogene Family	Associated with both constitutive and regulated secretory pathways, and may be involved in protein transport; Rab are key regulators of intracellular membrane trafficking	Vesicle-mediated transport
30	RAB8B	RAB8B, Member RAS Oncogene Family	Key regulator of intracellular membrane trafficking	Vesicle-mediated transport
30	RNF111	Ring Finger Protein 111	Enhancer of gene transription; associated with KRTAP5-9 and EDARADD (keratin metabolism)	Class I MHC mediated antigen processing and presentation
30	RORA	RAR Related Orphan Receptor A	Transcriptional regulation of some genes involved in circadian rhythm, member of the NR1 subfamily of nuclear hormone receptor; Key regulator of embryonic development, cellular differentiation, immunity, circadian rhythm as well as lipid, steroid, xenobiotics and glucose metabolism	Cytokine Signaling in Immune Systém
30	SLC24A1	Solute Carrier Family 24 Member 1	Critical component of the visual transduction cascade, controlling the calcium concentration of outer segments during light and darkness	Signaling by GPCR
30	SLC51B	Solute Carrier Family 51 Subunit Beta	Intestinal basolateral transporter responsible for bile acid export from enterocytes into portal blood	Drug Induction of Bile Acid Pathway
30	SLTM	SAFB Like Transcription Modulator	When overexpressed, acts as a general inhibitor of transcription that eventually leads to apoptosis
30	SNX1	Sorting Nexin 1	Regulates the cell-surface expression of epidermal growth factor receptor
30	SNX22	Sorting Nexin 22	Plays a role in intracellular trafficking; Epithelioid Trophoblastic Tumor (gene associated is KRT18); Interaction with CSNK1A1 (keratin) and CSNK1E (circadian rhythm)
30	SPG21	SPG21 Abhydrolase Domain Containing, Maspardin	May play a role as a negative regulatory factor in CD4-dependent T-cell activation
30	TCF12	Transcription Factor 12	Involved in the initiation of neuronal differentiation; activates transcription; interaction with ID2 and CREBBP (circadian rhythm)	Myogenesis
30	TLN2	Talin 2	Significant role in the assembly of actin filaments	Integrin Pathway
30	TPM1	Tropomyosin 1	Binds to actin filaments in muscle and non-muscle cells	Striated Muscle Contraction
30	TRIP4	Thyroid Hormone Receptor Interactor 4	Plays a role in thyroid hormone receptor and estrogen receptor transactivation; Also involved in androgen receptor transactivation;
30	USP3	Ubiquitin Specific Peptidase 3	Associates with the chromatin	Deubiquitination
30	UBAP1L	Ubiquitin Associated Protein 1 Like
30	VPS13C	Vacuolar Protein Sorting 13 Homolog C	Necessary for proper mitochondrial function and maintenance of mitochondrial transmembrane potential
30	ZNF609	Zinc Finger Protein 609	Transcription factor
36	CALCRL	Calcitonin Receptor Like Receptor
36	COL3A1	Collagen Type III Alpha 1 Chain	Collagen metabolism - extensible connective tissue	Collagen formation
36	COL5A2	Collagen Type V Alpha 2 Chain	Collagen metabolism - fibrillar collagen	Collagen formation
36	FAM171B	Family With Sequence Similarity 171 Member B
36	FSIP2	Fibrous Sheath Interacting Protein 2	Associated with the sperm fibrous sheath
36	GULP1	GULP PTB Domain Containing Engulfment Adaptor 1	Phagocytosis of apoptotic cells	Arf6 signaling events
36	ITGAV	Integrin Subunit Alpha V	Various cellular processes	Integrin Pathway
36	TFPI	Tissue Factor Pathway Inhibitor	Regulates the tissue factor (TF)-dependent pathway of blood coagulation	Formation of Fibrin Clot (Clotting Cascade)
36	ZC3H15	Zinc Finger CCCH-Type Containing 15	Stimulates DRG1 GTPase activity likely by increasing the affinity for the potassium ions
36	ZNF804A	Zinc Finger Protein 804A	Zinc finger binding protein
36	ZSWIM2	Zinc Finger SWIM-Type Containing 2	E3 ubiquitin-protein ligase involved in the regulation of Fas-, DR3- and DR4-mediated apoptosis
21	ANO3	Anoctamin 3	calcium dependent phospholipid scramblase activity; may inhibit pain signaling; potassium channel regulator	Ion channel transport
