# Supplementary material for: Genomic and Transcriptomic Characterization of Atypical Recurrent Flank Alopecia in the Cesky Fousek
Source: Genes (Basel). 2022 Apr 7;13(4):650. doi: 10.3390/genes13040650 (PMC9033119; doi:10.3390/genes13040650)
Supplement: Supplementary file 1 [file genes-13-00650-s001.zip › Table S5.xlsx]

## Sheet: List1
Table S5: Results of differential expression analysis investigating biopsies of alopecic skin of dogs with aRFA and control biopsies. Significantly differentially expressed genes sorted by Log2 Fold Change; BaseMean, mean of normalized read counts across all samples; LfcSE, standard error of the log2FoldChange; Stat, the log2FoldChange divided by lfcSE are presented. In red are marked strongly do…
Gene Name	BaseMean	Log2FC	LfcSE	Stat	Pvalue	FDR
LOC111093568	741.518	-9.4212	1.4327	-6.57585	4.84e-11	1.87e-08
KRT37	3745.59	-8.30949	1.00582	-8.2614	1.44e-16	1.95e-13
LOC111093437	648.485	-7.93065	1.27891	-6.20109	5.61e-10	1.32e-07
LOC102151701	588.303	-7.50807	1.31746	-5.69888	1.21e-08	1.72e-06
LOC111093530	1462.04	-6.51722	1.198	-5.44009	5.33e-08	5.96e-06
LOC111093552	3903.63	-6.18945	1.21159	-5.10855	3.25e-07	2.58e-05
LOC490986	4628.52	-6.00261	1.03361	-5.80741	6.34e-09	1.03e-06
MYMK	5.03638	-5.93232	1.60935	-3.68615	0.000227669	0.00449784
KRT41	630.702	-5.88535	1.16241	-5.06306	4.13e-07	3.1e-05
LOC111093547	2141.89	-5.71372	1.46828	-3.89143	9.97e-05	0.00240446
LOC111093512	755.363	-5.34181	1.11812	-4.77751	1.77e-06	9.9e-05
LOC102151694	11.9176	-4.90037	0.950618	-5.15493	2.54e-07	2.1e-05
CEACAM18	16.2322	-4.74159	0.748141	-6.33783	2.33e-10	6.91e-08
LOC111093544	3760.89	-4.69001	1.2439	-3.77041	0.000162977	0.00347861
LOC478220	7.36362	-4.47247	1.01209	-4.41902	9.91e-06	0.000395187
LOC102151782	4482.6	-4.10314	1.18296	-3.46852	0.000523325	0.0082447
LOC100686192	11.4193	-4.08157	0.857672	-4.75889	1.95e-06	0.000106658
SLC17A8	20.2099	-4.05765	0.867918	-4.67515	2.94e-06	0.000149031
CLRN3	35.6919	-4.03924	1.08156	-3.73466	0.000187969	0.00386346
LOC111096486	11.8358	-3.9009	0.728144	-5.35732	8.45e-08	8.58e-06
COL6A6	269.887	-3.80791	0.651805	-5.84209	5.15e-09	8.72e-07
ZYG11A	8.36567	-3.7098	0.85046	-4.36211	1.29e-05	0.000490622
NXPE4	8.40619	-3.56095	0.968509	-3.67673	0.00023624	0.0046271
NTS	19.4505	-3.54946	0.872655	-4.06743	4.75e-05	0.00135905
NR0B1	9.69153	-3.48957	0.878318	-3.97301	7.1e-05	0.00185281
LOC111093554	6.81534	-3.43528	0.889636	-3.86144	0.000112721	0.00263927
MRGPRG	36.7764	-3.42832	0.728053	-4.70889	2.49e-06	0.000130207
LOC111095202	6.83321	-3.37549	0.921852	-3.66164	0.000250603	0.00483404
LOC100687278	4.88588	-3.33296	0.966011	-3.45023	0.000560101	0.00870852
SULT1D1	7.47507	-3.33173	0.970198	-3.43407	0.000594592	0.00914624
CLDN17	296.028	-3.23142	0.424471	-7.61284	2.68e-14	2.52e-11
HOXC12	4.79858	-3.21083	0.918909	-3.49418	0.000475524	0.00772316
ALOX15	608.641	-3.20294	0.426884	-7.50307	6.23e-14	5.4e-11
LOC111090110	70.9914	-3.1909	0.772279	-4.1318	3.6e-05	0.00110187
AGT	151.444	-3.17677	0.493464	-6.43768	1.21e-10	4.1e-08
SFTPB	24.3983	-3.06784	0.679075	-4.51767	6.25e-06	0.0002756
LOC102152037	5.77316	-3.06256	0.821181	-3.72945	0.000191897	0.00392555
VWA3A	29.9745	-3.01617	0.834669	-3.61361	0.000301963	0.00554317
LOC111093549	430.827	-3.01047	0.829	-3.63144	0.000281842	0.00526307
SLC30A8	54.2223	-3.00551	0.568165	-5.28985	1.22e-07	1.17e-05
LOC610614	36.0908	-2.99908	0.675922	-4.43702	9.12e-06	0.000367946
LOC482707	64.6057	-2.98176	0.761578	-3.91524	9.03e-05	0.00221614
GJA3	31.721	-2.96349	0.625163	-4.74035	2.13e-06	0.000115439
MPP4	56.8948	-2.92549	0.314683	-9.29662	1.45e-20	4.48e-17
APCDD1L	4.83002	-2.92385	0.830875	-3.519	0.000433184	0.00722944
CPA1	9.36231	-2.92288	0.712407	-4.10282	4.08e-05	0.00122349
FGF5	124.674	-2.89632	0.540924	-5.35439	8.58e-08	8.68e-06
LOC486520	2217.17	-2.82832	0.816502	-3.46395	0.000532307	0.00834834
LOC111096476	6.74089	-2.8135	0.641924	-4.38292	1.17e-05	0.000455007
UCMA	10.0533	-2.79467	0.65227	-4.28453	1.83e-05	0.000639256
CLDN14	17.6055	-2.7681	0.714104	-3.87633	0.000106045	0.00251108
ADAMTS16	47.618	-2.76274	0.515013	-5.3644	8.12e-08	8.29e-06
LOC111096475	6.82639	-2.74664	0.689243	-3.98501	6.75e-05	0.00178973
LOC111091367	5.09572	-2.73645	0.746939	-3.66355	0.000248743	0.00481103
LOC111091504	9.36894	-2.72969	0.757799	-3.60213	0.000315618	0.00574993
LOC102156543	45.2499	-2.71944	0.704693	-3.85904	0.000113833	0.00265199
LOC106560017	14.7635	-2.6717	0.711829	-3.75328	0.000174532	0.00368527
C3H4orf50	6.72643	-2.67117	0.763443	-3.49884	0.000467278	0.0076674
HMCN2	486.043	-2.60852	0.338584	-7.70421	1.32e-14	1.3e-11
MAT1A	904.037	-2.54501	0.604592	-4.20946	2.56e-05	0.000835627
PLA2G5	67.2769	-2.52645	0.362727	-6.96514	3.28e-12	1.82e-09
FFAR4	35.1488	-2.50798	0.617727	-4.06001	4.91e-05	0.00139741
CPA6	18.8583	-2.48218	0.633721	-3.91684	8.97e-05	0.00220656
LOC106559795	35.2238	-2.45703	0.41756	-5.88426	4e-09	7.09e-07
SLC38A11	10.3452	-2.4563	0.655629	-3.74647	0.000179338	0.00374338
CCR8	32.5726	-2.42758	0.433691	-5.59748	2.17e-08	2.92e-06
CFAP47	40.3993	-2.38942	0.447649	-5.33771	9.41e-08	9.32e-06
OTOP2	49.6083	-2.36098	0.565663	-4.17383	3e-05	0.000958939
STOX1	152.998	-2.35061	0.475676	-4.94161	7.75e-07	5.07e-05
LOC111093344	59.3646	-2.34806	0.472518	-4.96926	6.72e-07	4.49e-05
TNNI1	172.992	-2.31056	0.465664	-4.96187	6.98e-07	4.64e-05
SLC45A3	730.376	-2.29789	0.365006	-6.29548	3.06e-10	8.45e-08
LOC102157107	10.1612	-2.29437	0.52418	-4.37706	1.2e-05	0.000464074
LOC111098224	12.6715	-2.28297	0.562935	-4.05549	5e-05	0.00141536
DPYSL5	36.5309	-2.27647	0.529911	-4.29594	1.74e-05	0.000616181
KRT75	8824.6	-2.26968	0.64477	-3.52014	0.000431312	0.00721397
NME9	20.1073	-2.26871	0.485758	-4.67044	3.01e-06	0.000150517
GNMT	510.119	-2.26134	0.44685	-5.06062	4.18e-07	3.13e-05
LMOD2	58.8936	-2.25912	0.419139	-5.3899	7.05e-08	7.37e-06
C1QL1	8.66475	-2.25719	0.646	-3.49409	0.000475672	0.00772316
LOC102156046	896.311	-2.25418	0.448791	-5.02279	5.09e-07	3.71e-05
KRT13	306.947	-2.24687	0.455467	-4.93311	8.09e-07	5.27e-05
LOC102152551	10.034	-2.24242	0.642875	-3.48811	0.000486449	0.00785688
LOC611766	933.205	-2.23222	0.222115	-10.0499	9.2e-24	4.98e-20
BEX5	274.259	-2.22974	0.432435	-5.15623	2.52e-07	2.09e-05
SLC28A1	13.9618	-2.22845	0.636997	-3.49836	0.000468122	0.00767542
LOC106559315	15.4465	-2.20594	0.51972	-4.24448	2.19e-05	0.000743262
CYB5R2	581.47	-2.19198	0.374564	-5.85209	4.85e-09	8.34e-07
LOC102155509	32.3316	-2.19002	0.403775	-5.42385	5.83e-08	6.38e-06
HHIP	185.27	-2.18545	0.288521	-7.57464	3.6e-14	3.25e-11
DIO1	73.2092	-2.18413	0.339556	-6.43233	1.26e-10	4.18e-08
PRR9	20733	-2.13427	0.399877	-5.33731	9.43e-08	9.32e-06
COL28A1	980.278	-2.13089	0.445451	-4.78367	1.72e-06	9.7e-05
DLX1	48.9508	-2.12031	0.432579	-4.90155	9.51e-07	6.02e-05
LOC102151524	26.3202	-2.10166	0.522099	-4.02541	5.69e-05	0.00155228
HECW1	29.2713	-2.09743	0.386537	-5.42621	5.76e-08	6.32e-06
TMPRSS2	38.8604	-2.03094	0.51937	-3.91039	9.21e-05	0.00225095
OSBP2	264.038	-2.02112	0.488954	-4.13355	3.57e-05	0.00109814
PDZRN3	1878.32	-2.01417	0.260594	-7.72913	1.08e-14	1.12e-11
LOC111091945	20.0741	-2.01181	0.467794	-4.30064	1.7e-05	0.000606534
SHH	51.3775	-2.00208	0.575322	-3.47993	0.000501546	0.00802289
SLPI	2372.36	-1.99242	0.453477	-4.39364	1.11e-05	0.000437836
LOC111092939	8.6239	-1.96642	0.54843	-3.58555	0.000336373	0.0059968
MARCOL	124.756	-1.95914	0.479356	-4.08703	4.37e-05	0.0012882
TNC	2254.39	-1.94692	0.334375	-5.82257	5.79e-09	9.57e-07
LOC100688102	26.1025	-1.9321	0.407631	-4.73983	2.14e-06	0.000115449
DAB1	79.2082	-1.92495	0.259422	-7.42016	1.17e-13	9.38e-11
ANKS1B	42.402	-1.91072	0.401676	-4.75687	1.97e-06	0.000107458
DCC	17.532	-1.90088	0.454509	-4.18228	2.89e-05	0.000933651
ILDR2	74.9502	-1.89348	0.500425	-3.78375	0.000154483	0.00334653
LOC111095553	51.1928	-1.89326	0.447429	-4.23143	2.32e-05	0.000776511
LOC111093291	27.275	-1.89024	0.527029	-3.58661	0.000335009	0.0059774
IGSF10	279.331	-1.88781	0.419018	-4.50533	6.63e-06	0.00028764
GGT1	181.054	-1.88175	0.521003	-3.61178	0.000304105	0.00557303
RBP5	68.4674	-1.87929	0.384408	-4.88879	1.01e-06	6.26e-05
LOC111095842	12.7373	-1.87791	0.473738	-3.96404	7.37e-05	0.0019078
F11	17.8263	-1.87751	0.483786	-3.88087	0.000104083	0.00247273
PI16	6308.11	-1.86772	0.315012	-5.92904	3.05e-09	5.54e-07
BMP3	64.3842	-1.86288	0.277238	-6.71944	1.82e-11	8.06e-09
JAKMIP1	63.96	-1.85881	0.39427	-4.71456	2.42e-06	0.000128811
DLX2	32.8912	-1.85168	0.363167	-5.09869	3.42e-07	2.69e-05
LOC102153401	7.50319	-1.83172	0.529119	-3.46182	0.000536532	0.00840173
LOC111097518	28.0052	-1.8256	0.430306	-4.24257	2.21e-05	0.000747275
LOC490054	14.895	-1.81339	0.495638	-3.65871	0.000253492	0.00487674
LOC102152940	9.19414	-1.81016	0.476683	-3.79741	0.000146214	0.00319646
HSPB3	123.745	-1.80909	0.283602	-6.37897	1.78e-10	5.59e-08
CCL24	589.285	-1.80401	0.322391	-5.59572	2.2e-08	2.92e-06
SAMD11	416.246	-1.77157	0.226972	-7.80524	5.94e-15	6.56e-12
LOC111095510	30.8775	-1.77066	0.348053	-5.08733	3.63e-07	2.83e-05
LOC102152170	52.6674	-1.74896	0.279979	-6.24676	4.19e-10	1.03e-07
TDRD12	101.31	-1.74355	0.443587	-3.93057	8.47e-05	0.00211303
GJB6	4263.97	-1.73496	0.390639	-4.44135	8.94e-06	0.000362324
HOXC13	1064.55	-1.73376	0.409134	-4.23763	2.26e-05	0.000761529
LOC102151579	65.9104	-1.73209	0.328262	-5.27656	1.32e-07	1.23e-05
LOC611685	116.877	-1.72809	0.447658	-3.86029	0.000113251	0.00264696
MEP1B	645.873	-1.72336	0.3584	-4.80848	1.52e-06	8.75e-05
COL4A4	327.578	-1.72326	0.446475	-3.8597	0.000113527	0.0026477
DNAJC6	443.382	-1.69702	0.48927	-3.46848	0.000523413	0.0082447
FAM180A	289.253	-1.68984	0.228123	-7.40759	1.29e-13	9.94e-11
APELA	18.7186	-1.68692	0.359871	-4.68757	2.76e-06	0.00014146
LOC111096027	14.56	-1.68594	0.399534	-4.21976	2.45e-05	0.000804426
LOC111089949	18.3142	-1.68392	0.392735	-4.28767	1.81e-05	0.000631294
SYT13	117.551	-1.67417	0.461621	-3.62672	0.000287045	0.00535077
OGN	746.918	-1.66546	0.290093	-5.74114	9.4e-09	1.39e-06
LOC111098544	26.037	-1.65416	0.416528	-3.9713	7.15e-05	0.00185944
CYP27B1	209.288	-1.65011	0.414257	-3.9833	6.8e-05	0.00180042
NCAM1	267.4	-1.64204	0.327092	-5.02012	5.16e-07	3.74e-05
GRIA4	182.468	-1.64008	0.393149	-4.17164	3.02e-05	0.000965355
LEF1	957.142	-1.63637	0.453475	-3.60851	0.000307958	0.00563887
SPP1	1539.62	-1.63394	0.327531	-4.98865	6.08e-07	4.2e-05
HUNK	269.733	-1.62834	0.415604	-3.91801	8.93e-05	0.00220159
LOC102154308	68.4571	-1.62788	0.313042	-5.2002	1.99e-07	1.74e-05
LOC106559606	39.1813	-1.62461	0.398647	-4.07532	4.6e-05	0.00133176
ANKRD34B	38.6262	-1.6234	0.37291	-4.35332	1.34e-05	0.000505593
ISM2	12.4273	-1.6229	0.446192	-3.63721	0.000275608	0.00517344
CNMD	25.0921	-1.61741	0.41103	-3.93501	8.32e-05	0.00208159
HS3ST5	48.1448	-1.61596	0.422436	-3.82534	0.000130594	0.00293503
DAPL1	2621.05	-1.6159	0.44662	-3.61806	0.000296821	0.00547198
LOC608422	180.557	-1.58723	0.387608	-4.09495	4.22e-05	0.00125743
LOC111090473	38.2336	-1.57644	0.319796	-4.92952	8.24e-07	5.34e-05
FOXE1	475.559	-1.57458	0.379823	-4.14557	3.39e-05	0.00105257
DDAH1	197.203	-1.56849	0.361753	-4.33581	1.45e-05	0.000535438
CD1C	25.4365	-1.56316	0.442084	-3.53589	0.000406401	0.00689322
KLK6	1263.16	-1.56075	0.351965	-4.43438	9.23e-06	0.000370775
ADAMTS13	46.5364	-1.55747	0.405994	-3.83618	0.000124963	0.00282906
MYH15	26.3269	-1.55643	0.403523	-3.85711	0.000114735	0.00266725
PLPP4	23.7352	-1.55199	0.414616	-3.7432	0.000181693	0.00377751
LOC111096090	57.4855	-1.55109	0.372615	-4.16272	3.14e-05	0.000993597
CNTNAP4	61.2445	-1.55102	0.361423	-4.29141	1.78e-05	0.00062479
SCUBE1	137.434	-1.54838	0.246023	-6.29363	3.1e-10	8.45e-08
ETNPPL	188.491	-1.53155	0.293762	-5.21356	1.85e-07	1.63e-05
TRPM6	174.823	-1.51638	0.274424	-5.5257	3.28e-08	4.06e-06
IL-15L	127.741	-1.51138	0.25851	-5.8465	5.02e-09	8.56e-07
LOC480423	1556.66	-1.51037	0.302018	-5.00091	5.71e-07	4.01e-05
LOC475367	2699.64	-1.50906	0.337199	-4.47528	7.63e-06	0.000323212
LOC106559032	23.6497	-1.509	0.402961	-3.74478	0.000180548	0.00376093
SLC39A10	5889.7	-1.50719	0.374395	-4.02565	5.68e-05	0.00155228
LOC102152414	51.4809	-1.4965	0.409159	-3.65751	0.000254679	0.00489088
TMEM221	62.2477	-1.49626	0.296537	-5.04579	4.52e-07	3.34e-05
C10H2orf40	65.1117	-1.49468	0.301377	-4.95952	7.07e-07	4.68e-05
FLRT1	87.7506	-1.48731	0.377647	-3.93837	8.2e-05	0.00206938
FOXN1	1199.81	-1.47552	0.408497	-3.61208	0.000303756	0.00557134
CFAP61	21.5574	-1.47532	0.38517	-3.83031	0.000127983	0.00288235
SORCS2	577.475	-1.47008	0.359834	-4.08543	4.4e-05	0.00128994
HAP1	319.86	-1.46827	0.362286	-4.0528	5.06e-05	0.00142728
SLC1A4	1728.58	-1.46548	0.339646	-4.31471	1.6e-05	0.000576464
WNK4	310.434	-1.46031	0.256103	-5.70204	1.18e-08	1.71e-06
MSX2	295.45	-1.45386	0.400972	-3.62584	0.000288021	0.00535077
AGPAT3	1582.5	-1.45194	0.269171	-5.39411	6.89e-08	7.23e-06
CTHRC1	329.402	-1.44972	0.280499	-5.16836	2.36e-07	1.98e-05
FAM101A	170.389	-1.44624	0.272303	-5.31114	1.09e-07	1.05e-05
LOC102151706	298.159	-1.4411	0.345196	-4.17473	2.98e-05	0.000958939
LOC102154061	49.3273	-1.42969	0.294964	-4.84701	1.25e-06	7.49e-05
LGR5	1028.42	-1.42966	0.321173	-4.45137	8.53e-06	0.000349747
EGFL6	48.2795	-1.42242	0.356164	-3.99371	6.5e-05	0.00173592
ITGA11	1073.19	-1.41637	0.198066	-7.15101	8.61e-13	5.75e-10
GJA1	65320.8	-1.40562	0.315605	-4.45374	8.44e-06	0.000347883
LOC106560204	87.9204	-1.39825	0.360409	-3.87963	0.000104615	0.00248265
NCKAP5	926.976	-1.39569	0.363916	-3.8352	0.00012546	0.00283438
MEST	204.167	-1.39345	0.318675	-4.37262	1.23e-05	0.000471925
LOC106558629	31.7799	-1.39241	0.388053	-3.58821	0.000332961	0.00595068
LOC102156506	17.8778	-1.39177	0.375397	-3.70746	0.00020935	0.00419534
LIPG	1409.26	-1.39011	0.296889	-4.68227	2.84e-06	0.000144821
KLK4	328.264	-1.38922	0.178046	-7.80257	6.07e-15	6.56e-12
PYCR1	757.772	-1.38451	0.278652	-4.96858	6.74e-07	4.49e-05
TESC	67.5548	-1.38249	0.36206	-3.81841	0.000134313	0.00298761
LOC488268	51.4568	-1.38241	0.300632	-4.59835	4.26e-06	0.000202569
LHX2	645.982	-1.37651	0.27097	-5.07993	3.78e-07	2.9e-05
LOC106558675	89.6031	-1.37484	0.274255	-5.01299	5.36e-07	3.82e-05
KCNJ4	52.8764	-1.37052	0.218264	-6.27921	3.4e-10	8.77e-08
CXCL12	2077.32	-1.36364	0.250456	-5.44463	5.19e-08	5.85e-06
PRELP	2891.78	-1.36064	0.293032	-4.64331	3.43e-06	0.000168654
SLC39A8	2088.29	-1.36062	0.309238	-4.3999	1.08e-05	0.000426959
KRT3	110.641	-1.35816	0.36104	-3.7618	0.000168698	0.00358305
LRRN2	223.895	-1.35682	0.263831	-5.14278	2.71e-07	2.2e-05
SERTM1	59.3351	-1.3483	0.338238	-3.98625	6.71e-05	0.00178257
PAMR1	333.041	-1.3458	0.337566	-3.9868	6.7e-05	0.00178068
GNG4	148.304	-1.33674	0.348086	-3.84025	0.000122908	0.002795
LMX1A	72.0612	-1.33034	0.3329	-3.99621	6.44e-05	0.0017219
LOC478441	169.227	-1.32125	0.294184	-4.49123	7.08e-06	0.000302294
GGA2	1139.43	-1.31861	0.220121	-5.9904	2.09e-09	4.01e-07
PRDM8	153.637	-1.31505	0.327495	-4.01549	5.93e-05	0.0016069
CFAP161	29.6345	-1.30972	0.361312	-3.6249	0.000289073	0.0053657
CACNG4	240.432	-1.30581	0.341703	-3.82148	0.000132651	0.00296895
LOC477353	860.18	-1.29984	0.35748	-3.63611	0.000276785	0.00519104
LOC100855618	311.924	-1.29834	0.236805	-5.48273	4.19e-08	4.98e-06
LOC102153553	117.187	-1.29234	0.211209	-6.11878	9.43e-10	2.04e-07
THBS4	4287.79	-1.28867	0.299655	-4.30053	1.7e-05	0.000606534
LOC100856270	439.662	-1.28577	0.331252	-3.88154	0.000103797	0.00246867
DUSP2	181.802	-1.2838	0.362879	-3.53782	0.000403451	0.00685392
LOC100688639	184.936	-1.28048	0.271691	-4.713	2.44e-06	0.00012917
LOC100856186	63.1223	-1.27689	0.341499	-3.73908	0.000184695	0.00381791
LOC111092148	444.952	-1.2747	0.34553	-3.68912	0.000225034	0.004456
FAM83D	822.08	-1.273	0.285369	-4.46089	8.16e-06	0.000339718
FBXO10	299.319	-1.26997	0.213048	-5.96094	2.51e-09	4.76e-07
EPHB2	378.981	-1.26564	0.268908	-4.70659	2.52e-06	0.00013105
HAS3	342.092	-1.25989	0.311753	-4.04132	5.32e-05	0.00148365
GNAL	25.2104	-1.25696	0.363383	-3.45905	0.000542079	0.00845261
EXTL1	209.616	-1.24943	0.318988	-3.91686	8.97e-05	0.00220656
SLC8A2	46.4907	-1.24814	0.274715	-4.5434	5.54e-06	0.00025063
SARDH	610.291	-1.24675	0.248993	-5.00716	5.52e-07	3.89e-05
TNNT1	24.0416	-1.23616	0.298315	-4.1438	3.42e-05	0.00105616
LOC111094325	24.4471	-1.23422	0.300855	-4.10238	4.09e-05	0.00122412
GALNT5	126.506	-1.21731	0.316622	-3.84469	0.000120703	0.00276149
FHOD3	808.623	-1.21464	0.349082	-3.47952	0.000502304	0.00802731
GRB14	440.089	-1.21301	0.246104	-4.92885	8.27e-07	5.34e-05
ESR2	180.354	-1.21221	0.346775	-3.49567	0.00047288	0.00770645
VDR	3347.02	-1.21095	0.268952	-4.50247	6.72e-06	0.00029017
BEND4	65.3199	-1.20882	0.297135	-4.06824	4.74e-05	0.00135611
SLC40A1	5306.74	-1.19941	0.312525	-3.83782	0.000124133	0.00281321
AASS	352.832	-1.1977	0.34378	-3.48393	0.000494105	0.00793318
LOC491970	1146.8	-1.19752	0.190438	-6.28823	3.21e-10	8.48e-08
CBS	1957.33	-1.19481	0.213817	-5.588	2.3e-08	3.01e-06
MARCKSL1	620.922	-1.18733	0.319535	-3.71579	0.000202569	0.00408592
PTHLH	63.866	-1.18341	0.282957	-4.18229	2.89e-05	0.000933651
TIAM2	370.232	-1.18113	0.247828	-4.76592	1.88e-06	0.000103795
LOC102151125	15.8675	-1.18072	0.33068	-3.57057	0.000356212	0.00625263
ANGPTL1	2129.53	-1.18054	0.30896	-3.821	0.000132911	0.00297169
CHRNB4	26.1704	-1.17882	0.343666	-3.43014	0.000603273	0.00923384
TMOD2	1827.52	-1.17828	0.185994	-6.33506	2.37e-10	6.94e-08
SNX31	234.152	-1.17596	0.301187	-3.90441	9.45e-05	0.00229953
ITGBL1	2611.22	-1.17312	0.271987	-4.31315	1.61e-05	0.000577672
EFHD1	2224.65	-1.16836	0.324929	-3.59576	0.000323448	0.0058434
ATP8A2	67.3531	-1.16748	0.302183	-3.86348	0.000111781	0.00262394
ADAMTSL4	1053.48	-1.16622	0.265653	-4.39001	1.13e-05	0.000443614
P2RX2	21.4435	-1.16609	0.324279	-3.59593	0.00032323	0.0058434
ITGB8	2135.21	-1.16028	0.21288	-5.45039	5.03e-08	5.73e-06
CPXM2	1277.95	-1.16023	0.221964	-5.22711	1.72e-07	1.55e-05
MXRA5	11677.5	-1.15743	0.325526	-3.55558	0.000377145	0.00650402
DLX3	1315.19	-1.15436	0.317642	-3.63416	0.000278883	0.00522587
LOC106559500	125.971	-1.15353	0.235619	-4.89576	9.79e-07	6.11e-05
AHCY	3941.21	-1.14752	0.262069	-4.37871	1.19e-05	0.000462228
RAB39B	295.134	-1.14525	0.307187	-3.7282	0.000192851	0.00394133
DBX2	229.79	-1.14436	0.297852	-3.84203	0.000122019	0.00278571
RXRG	147.075	-1.13234	0.275646	-4.10795	3.99e-05	0.00119995
VTCN1	316.627	-1.13173	0.225195	-5.02556	5.02e-07	3.67e-05
ATP6V0A4	639.008	-1.12572	0.276649	-4.06913	4.72e-05	0.00135274
TMEM35A	61.4475	-1.12344	0.216403	-5.19142	2.09e-07	1.79e-05
CLEC3B	3588.87	-1.12215	0.284308	-3.94693	7.92e-05	0.00201795
C29H8orf34	94.5279	-1.12176	0.307675	-3.64592	0.000266432	0.00506294
RNF152	3798.48	-1.1213	0.277144	-4.04592	5.21e-05	0.00145921
RNF182	150.469	-1.11216	0.28405	-3.91536	9.03e-05	0.00221614
BNC2	2072.29	-1.10697	0.225451	-4.91	9.11e-07	5.81e-05
TDRP	225.87	-1.10696	0.257448	-4.29975	1.71e-05	0.00060768
FBLN7	1640.98	-1.10335	0.240298	-4.59161	4.4e-06	0.000207573
GJB2	8031.07	-1.10161	0.28046	-3.92787	8.57e-05	0.002132
LOC106557476	1371.19	-1.09855	0.224228	-4.89925	9.62e-07	6.06e-05
C1QTNF7	406.684	-1.09702	0.266268	-4.11996	3.79e-05	0.00114704
KRT6B	12988.5	-1.09144	0.23964	-4.55451	5.25e-06	0.000242308
FAM180B	586.524	-1.08393	0.315835	-3.43194	0.000599273	0.00919211
GPR155	1431.47	-1.08115	0.215577	-5.01513	5.3e-07	3.79e-05
AGPAT4	915.415	-1.07679	0.236089	-4.56094	5.09e-06	0.000235506
PHYHIP	2306.52	-1.07465	0.214244	-5.01604	5.27e-07	3.78e-05
LOC102151465	93.4412	-1.07449	0.286313	-3.75287	0.00017482	0.00368648
KCNK2	261.825	-1.0695	0.2709	-3.94795	7.88e-05	0.00201172
GOLGA7B	181.519	-1.06645	0.279537	-3.81504	0.00013616	0.00301628
LOC102155954	27.9322	-1.06121	0.263807	-4.02266	5.75e-05	0.00156496
CAMTA1	358.369	-1.05923	0.145159	-7.29704	2.94e-13	2.12e-10
TEX15	50.2342	-1.05811	0.302268	-3.50057	0.000464265	0.00763234
PBX4	73.0642	-1.05343	0.258494	-4.07525	4.6e-05	0.00133176
PPP2R2B	167.49	-1.05115	0.236383	-4.44683	8.71e-06	0.000355874
PLET1	9158.86	-1.04495	0.20898	-5.00024	5.73e-07	4.01e-05
RAB11FIP4	1733.05	-1.04449	0.255316	-4.09099	4.3e-05	0.00127173
KCNJ12	55.8015	-1.04448	0.304179	-3.43378	0.000595236	0.00914963
GXYLT2	786.159	-1.04427	0.244794	-4.26592	1.99e-05	0.000684993
TMC2	103.574	-1.04242	0.279372	-3.73131	0.000190489	0.00390042
GJB1	152.47	-1.04024	0.230555	-4.51188	6.43e-06	0.000280947
LOC102156123	39.7168	-1.03904	0.29815	-3.48496	0.000492205	0.00792029
BACH2	430.122	-1.03663	0.290135	-3.57292	0.000353017	0.00621166
LOC489396	214.689	-1.03283	0.23736	-4.35132	1.35e-05	0.000507622
LOC102153923	139.818	-1.02994	0.26581	-3.87472	0.000106749	0.002525
JMY	1377.4	-1.0279	0.272485	-3.77232	0.000161738	0.00345898
KCNJ6	65.4823	-1.02325	0.232475	-4.40154	1.07e-05	0.000425291
FANCB	170.052	-1.012	0.208689	-4.8493	1.24e-06	7.43e-05
RIMS2	44.398	-1.01088	0.289212	-3.49527	0.000473575	0.00770645
ABCA9	2022.08	-1.00731	0.266135	-3.78496	0.000153734	0.00333393
INTU	452.754	-1.00603	0.265421	-3.79032	0.000150453	0.00327228
LOC100684306	76.8328	-1.00525	0.264719	-3.79743	0.000146202	0.00319646
EIF4A2	12759.3	-0.999176	0.183947	-5.43187	5.58e-08	6.19e-06
RNF180	227.291	-0.997302	0.287494	-3.46895	0.000522495	0.0082447
BMPER	154.786	-0.996827	0.275227	-3.62183	0.000292523	0.00540194
PRICKLE1	1013.01	-0.996171	0.270225	-3.68645	0.0002274	0.00449784
SLC39A6	7182.42	-0.995628	0.246431	-4.04019	5.34e-05	0.00148765
ARMCX2	226.955	-0.993658	0.186997	-5.31376	1.07e-07	1.04e-05
HSPB1	4382.5	-0.986201	0.257933	-3.82348	0.00013158	0.00295263
LOC111090312	54.3404	-0.985829	0.264738	-3.72378	0.000196258	0.00399212
FZD3	412.223	-0.977991	0.26702	-3.66261	0.000249654	0.00482003
MAT2A	8904.93	-0.974904	0.218013	-4.47178	7.76e-06	0.000326646
SLAIN1	137.659	-0.973492	0.266214	-3.6568	0.000255382	0.00489805
ADAMTS8	118.246	-0.972885	0.270387	-3.59812	0.000320531	0.0058101
EMILIN3	149.064	-0.969629	0.265695	-3.64941	0.000262845	0.00500771
HSPA2	7066.7	-0.96958	0.234417	-4.13614	3.53e-05	0.00108737
TRIM59	2696.91	-0.968273	0.187093	-5.17537	2.27e-07	1.92e-05
GMCL1	3710.9	-0.967893	0.2587	-3.74137	0.000183023	0.00379591
CBX1	4482.13	-0.963513	0.159559	-6.03858	1.55e-09	3.03e-07
CALHM5	1060.79	-0.96326	0.155885	-6.17929	6.44e-10	1.48e-07
DSC2	11140.7	-0.962872	0.26334	-3.65638	0.000255801	0.00489938
KLK7	16525	-0.96021	0.175472	-5.47217	4.45e-08	5.23e-06
TTC21B	1059.31	-0.959123	0.203641	-4.70987	2.48e-06	0.000130207
ZNF608	480.975	-0.955316	0.225933	-4.22831	2.35e-05	0.000782775
MRC2	1984.73	-0.952836	0.223405	-4.26507	2e-05	0.000686536
S1PR5	763.42	-0.951182	0.228154	-4.16904	3.06e-05	0.000972156
LOC106559499	80.2384	-0.950466	0.242016	-3.92729	8.59e-05	0.00213346
LOC106559993	393.099	-0.947971	0.246057	-3.85264	0.00011685	0.00269901
FZD2	155.689	-0.947874	0.238619	-3.97234	7.12e-05	0.00185583
ALDH1L2	929.921	-0.946909	0.221102	-4.28267	1.85e-05	0.000643578
SLC25A48	367.645	-0.946899	0.276764	-3.42132	0.000623181	0.0094943
LRFN3	59.375	-0.941802	0.269031	-3.50071	0.000464013	0.00763234
FAM49A	1944.35	-0.93583	0.265675	-3.52246	0.000427563	0.00716788
WSCD2	195.868	-0.933912	0.191488	-4.87713	1.08e-06	6.6e-05
NDE1	2089.35	-0.93367	0.108083	-8.63846	5.7e-18	1.23e-14
GABRA3	380.382	-0.933002	0.194927	-4.78641	1.7e-06	9.62e-05
GABRP	2395.89	-0.927961	0.240072	-3.86534	0.000110935	0.00261166
GLI2	541.121	-0.92711	0.266525	-3.47851	0.000504219	0.0080407
LARGE2	373.046	-0.922388	0.218775	-4.21615	2.49e-05	0.000814174
EIF4E3	596.05	-0.916009	0.182538	-5.01818	5.22e-07	3.76e-05
TBC1D8B	132.884	-0.914265	0.226546	-4.03567	5.44e-05	0.00150528
SEMA6A	875.38	-0.913004	0.226236	-4.03563	5.45e-05	0.00150528
NREP	462.672	-0.912131	0.231726	-3.93625	8.28e-05	0.0020805
LOC102154314	204.973	-0.911544	0.202277	-4.50642	6.59e-06	0.000287251
STAC	268.571	-0.910817	0.156716	-5.81191	6.18e-09	1.01e-06
RUNX2	563.66	-0.906433	0.230317	-3.9356	8.3e-05	0.0020813
DDR2	4403.66	-0.905321	0.241648	-3.74644	0.00017936	0.00374338
MYB	252.127	-0.904504	0.184052	-4.91439	8.91e-07	5.7e-05
CLASP1	4127.62	-0.903646	0.239067	-3.77989	0.0001569	0.00337553
HOXC4	531.444	-0.902567	0.236551	-3.81553	0.000135888	0.00301336
SDC1	13184.9	-0.902063	0.200228	-4.50518	6.63e-06	0.00028764
PPFIBP2	2924.33	-0.900953	0.138603	-6.50026	8.02e-11	2.75e-08
PAPPA	781.13	-0.89731	0.255238	-3.51557	0.000438803	0.0073054
CUX1	1600.83	-0.895091	0.189899	-4.7135	2.43e-06	0.000129165
MAST1	37.7857	-0.893907	0.250304	-3.57128	0.000355243	0.00624576
THRB	2779.91	-0.89347	0.150386	-5.94119	2.83e-09	5.2e-07
ADGRA3	1509.21	-0.889373	0.251223	-3.54017	0.000399873	0.00681409
UNC5A	124.207	-0.886252	0.222809	-3.97763	6.96e-05	0.00182822
NHS	863.166	-0.885982	0.240362	-3.68604	0.00022777	0.00449784
AP2B1	2013.09	-0.881814	0.188812	-4.67034	3.01e-06	0.000150517
RASSF9	3018.85	-0.876738	0.243137	-3.60594	0.000311024	0.00568539
ARMCX6	370.31	-0.8744	0.161862	-5.40212	6.59e-08	7.06e-06
ADGRL3	1643.06	-0.87217	0.244259	-3.57067	0.000356069	0.00625263
SESN3	6298.85	-0.867784	0.242814	-3.57386	0.000351753	0.00619447
FAP	1948.84	-0.86572	0.223231	-3.87813	0.000105264	0.00249532
KHDRBS3	371.941	-0.86506	0.134932	-6.41107	1.44e-10	4.6e-08
MMP24	243.441	-0.860574	0.160851	-5.35013	8.79e-08	8.81e-06
MFAP4	2805.63	-0.860541	0.241515	-3.5631	0.000366503	0.00637638
PLOD2	838.22	-0.860213	0.223523	-3.84843	0.000118877	0.00273127
KIF2C	232.536	-0.858834	0.226604	-3.79001	0.000150638	0.00327228
SMO	781.216	-0.857936	0.176263	-4.86737	1.13e-06	6.91e-05
F2RL1	123.828	-0.857625	0.20651	-4.15295	3.28e-05	0.00103102
ENTPD2	639.944	-0.855993	0.136032	-6.29257	3.12e-10	8.45e-08
EDN1	247.687	-0.855974	0.246663	-3.47022	0.000520033	0.00823342
LOXL1	829.702	-0.854769	0.243241	-3.51408	0.000441287	0.00733546
SCNN1G	262	-0.853358	0.164212	-5.19668	2.03e-07	1.76e-05
PAK1	1170.77	-0.853314	0.157198	-5.42827	5.69e-08	6.28e-06
SPNS2	246.415	-0.850304	0.222782	-3.81675	0.000135221	0.00300164
CDK14	977.387	-0.849063	0.155608	-5.45642	4.86e-08	5.65e-06
CHST2	483.742	-0.848529	0.246384	-3.44393	0.00057333	0.00887595
SMARCA1	693.035	-0.843818	0.163944	-5.14698	2.65e-07	2.16e-05
FAM173B	438.123	-0.840487	0.182026	-4.61741	3.89e-06	0.000187711
KAZALD1	770.41	-0.840046	0.177361	-4.73637	2.18e-06	0.00011685
LOC106558831	742.711	-0.839635	0.19308	-4.34863	1.37e-05	0.000510302
ADGRD1	801.257	-0.833802	0.1867	-4.466	7.97e-06	0.000333634
ZNF618	232.659	-0.833012	0.22381	-3.72196	0.000197679	0.00401347
TCP11L1	903.098	-0.827043	0.210166	-3.93518	8.31e-05	0.00208159
TPC3	277.634	-0.825161	0.181657	-4.54241	5.56e-06	0.000250766
ZBED6CL	141.671	-0.825033	0.227134	-3.63236	0.000280842	0.00524893
NYAP1	294.906	-0.824188	0.131599	-6.26287	3.78e-10	9.51e-08
KIF21A	4913.28	-0.81979	0.176215	-4.6522	3.28e-06	0.000162277
CYP39A1	753.872	-0.818101	0.188965	-4.32937	1.5e-05	0.000545765
TAF15	4872.16	-0.813128	0.22186	-3.66505	0.000247288	0.00478717
SDK1	839.145	-0.811923	0.208144	-3.90077	9.59e-05	0.00232915
PLXNA2	2514.85	-0.811841	0.173658	-4.67495	2.94e-06	0.000149031
LOC102155900	2067.44	-0.811826	0.191958	-4.22917	2.35e-05	0.000782183
ARHGEF26	1365.5	-0.804151	0.226592	-3.5489	0.000386847	0.0066186
MXRA8	836.837	-0.801861	0.216044	-3.71157	0.000205978	0.00413159
EYA2	163.893	-0.801505	0.188068	-4.26178	2.03e-05	0.000693778
AMOT	466.694	-0.800229	0.153958	-5.19772	2.02e-07	1.75e-05
MYH14	6767.51	-0.795767	0.212356	-3.74732	0.000178734	0.00373752
PSEN2	220.62	-0.794317	0.195035	-4.07268	4.65e-05	0.00134473
SSC5D	644.061	-0.793915	0.209851	-3.78323	0.000154808	0.00334716
TRPV3	1394.82	-0.793215	0.152821	-5.19048	2.1e-07	1.79e-05
IFT22	133.921	-0.785518	0.154464	-5.08545	3.67e-07	2.83e-05
LOC111094054	502.438	-0.785198	0.194785	-4.0311	5.55e-05	0.00152865
ANTXR1	5270.92	-0.784891	0.208298	-3.76811	0.000164488	0.0035074
IL11RA	515.889	-0.782996	0.225589	-3.47091	0.000518707	0.00821842
SCD5	436.605	-0.782033	0.223846	-3.49362	0.00047652	0.00773112
GABPB2	478.638	-0.781582	0.196803	-3.9714	7.15e-05	0.00185944
PAPLN	2117.43	-0.780319	0.193254	-4.0378	5.4e-05	0.00149712
PLXNA1	2892.47	-0.780172	0.16314	-4.78223	1.73e-06	9.75e-05
EFNA5	744.492	-0.778773	0.186568	-4.1742	2.99e-05	0.000958939
RNF34	709.859	-0.776839	0.211772	-3.66828	0.000244187	0.00473985
USP54	2303.85	-0.773128	0.181783	-4.25302	2.11e-05	0.000718856
CACNB1	179.231	-0.772494	0.226159	-3.41571	0.000636157	0.00962821
ATAD2B	1449.07	-0.76721	0.179899	-4.26468	2e-05	0.000686634
FLNB	8527.78	-0.767046	0.213615	-3.59078	0.000329692	0.00591179
TEAD2	750.557	-0.767016	0.121184	-6.32938	2.46e-10	7.01e-08
FHDC1	1992.19	-0.763082	0.174069	-4.38379	1.17e-05	0.000454012
PODN	744.165	-0.761358	0.210176	-3.62247	0.000291802	0.00539323
SLC34A2	486.075	-0.760788	0.180262	-4.22046	2.44e-05	0.000803153
KIF7	458.08	-0.756669	0.17156	-4.41052	1.03e-05	0.000410273
KIAA0040	351.386	-0.755849	0.212743	-3.55286	0.00038106	0.00655066
NIPA1	362.091	-0.755818	0.181923	-4.1546	3.26e-05	0.00102508
LOC607768	376.416	-0.746929	0.172803	-4.32243	1.54e-05	0.000560392
GATB	554.645	-0.74657	0.193977	-3.84876	0.000118719	0.00273055
C6H16orf62	670.645	-0.746412	0.179014	-4.16957	3.05e-05	0.000971316
INTS3	2043.71	-0.745368	0.148858	-5.00724	5.52e-07	3.89e-05
CYP2U1	1045.39	-0.74276	0.13642	-5.44466	5.19e-08	5.85e-06
LOC102153796	236.254	-0.740626	0.213498	-3.469	0.000522401	0.0082447
DBN1	1292.77	-0.740081	0.185125	-3.99774	6.39e-05	0.00171296
CEP290	728.232	-0.738764	0.187919	-3.93129	8.45e-05	0.00210914
CASTOR1	1193.87	-0.735928	0.177402	-4.14836	3.35e-05	0.00104546
ZNF286A	317.752	-0.734894	0.162577	-4.52029	6.18e-06	0.000273892
SINHCAF	592.532	-0.730102	0.186929	-3.90577	9.39e-05	0.00228924
LOC100855574	1786.82	-0.72858	0.163541	-4.45504	8.39e-06	0.00034645
GAL3ST4	662.248	-0.72799	0.202569	-3.59378	0.000325912	0.00587319
STARD10	499.502	-0.724796	0.187873	-3.85789	0.000114368	0.00266157
TPM1	15543.7	-0.723505	0.143644	-5.03678	4.73e-07	3.49e-05
LPAR6	714.71	-0.721783	0.206001	-3.50379	0.000458695	0.00756095
CCDC8	677.995	-0.721291	0.146942	-4.90869	9.17e-07	5.84e-05
LOC479758	185.245	-0.71823	0.20034	-3.58505	0.000337013	0.00600327
NCKAP5L	379.371	-0.716518	0.16975	-4.22102	2.43e-05	0.000802379
DDX17	16210.5	-0.716211	0.180878	-3.95964	7.51e-05	0.00193128
ABCB8	890.253	-0.716069	0.143876	-4.97698	6.46e-07	4.35e-05
FBXO32	3463.09	-0.713234	0.162271	-4.39532	1.11e-05	0.000435261
LURAP1L	423.922	-0.71315	0.172079	-4.14432	3.41e-05	0.00105616
MCTS1	781.245	-0.712273	0.131669	-5.40955	6.32e-08	6.8e-06
PYGO1	1827.49	-0.711616	0.187491	-3.79547	0.000147363	0.00321833
ARHGAP28	486.923	-0.707375	0.186999	-3.78277	0.000155096	0.00335004
C8H14orf37	209.198	-0.706371	0.167087	-4.22756	2.36e-05	0.000782989
LOC111097304	127.062	-0.701603	0.195254	-3.59328	0.000326543	0.00587479
MACF1	18302.6	-0.700234	0.201625	-3.47295	0.000514779	0.00818014
P4HA2	1701.81	-0.699867	0.176907	-3.95612	7.62e-05	0.00195578
LOC102151330	439.073	-0.698101	0.180866	-3.85976	0.000113498	0.0026477
STON1	1613.72	-0.69681	0.149621	-4.65718	3.21e-06	0.000159133
LOC102153893	192.069	-0.694782	0.200351	-3.46783	0.000524684	0.00825272
TCHP	1024.64	-0.692401	0.195675	-3.53853	0.000402358	0.00684543
RNF39	510.217	-0.691553	0.202694	-3.4118	0.000645347	0.00975741
LOC609245	359.107	-0.691243	0.198557	-3.48133	0.000498922	0.00798681
SGSM1	239.207	-0.69009	0.172113	-4.00952	6.08e-05	0.00164103
PXDN	1271.54	-0.688522	0.195672	-3.51876	0.000433573	0.00722944
PRKCZ	743.865	-0.686507	0.158748	-4.32452	1.53e-05	0.000556037
RASGRP1	608.374	-0.682967	0.177174	-3.85478	0.000115833	0.00268412
TBX15	791.896	-0.679753	0.172983	-3.9296	8.51e-05	0.00211913
BLNK	622.933	-0.679418	0.135678	-5.00758	5.51e-07	3.89e-05
ARL15	1033.35	-0.674081	0.181409	-3.7158	0.000202565	0.00408592
EDA	421.153	-0.67144	0.15882	-4.22768	2.36e-05	0.000782989
JAG1	5310.34	-0.66839	0.173708	-3.84779	0.00011919	0.00273265
LOC489647	300.288	-0.66757	0.191458	-3.48677	0.000488887	0.00787862
LPAR3	557.696	-0.66701	0.195035	-3.41996	0.000626313	0.00951916
GTF2I	4679.21	-0.666418	0.185184	-3.59867	0.000319843	0.00580735
C31H21orf91	3009.74	-0.665632	0.19331	-3.44335	0.000574562	0.00888867
PRDX2	4632.56	-0.665208	0.137632	-4.83323	1.34e-06	7.88e-05
MKX	154.328	-0.663851	0.179243	-3.70364	0.00021253	0.00424334
FAM84B	1861.04	-0.662531	0.186804	-3.54666	0.000390152	0.0066646
PRPF38A	1007.37	-0.659743	0.168885	-3.90646	9.37e-05	0.0022853
INTS8	1056.32	-0.657664	0.115596	-5.68931	1.28e-08	1.79e-06
DPCD	332.748	-0.655773	0.160747	-4.07953	4.51e-05	0.00131806
ZNF185	4041.68	-0.653629	0.182836	-3.57495	0.000350293	0.0061788
BRAF	1051.49	-0.652448	0.145029	-4.49875	6.84e-06	0.000294696
EIF2B4	2562.82	-0.652049	0.149666	-4.35669	1.32e-05	0.00049875
KANK1	4934.1	-0.650801	0.127574	-5.10137	3.37e-07	2.66e-05
LTBP3	1139.65	-0.646255	0.113785	-5.67963	1.35e-08	1.87e-06
NEU3	583.976	-0.64434	0.133893	-4.81235	1.49e-06	8.65e-05
LOC478075	134.766	-0.641943	0.185538	-3.4599	0.000540369	0.00844363
FAM13B	2104.78	-0.640235	0.153407	-4.17344	3e-05	0.000959182
LAMB2	5598.87	-0.639323	0.155871	-4.1016	4.1e-05	0.00122654
ISLR	290.463	-0.637634	0.180276	-3.53699	0.000404718	0.00687005
ASB13	672.696	-0.636897	0.153243	-4.15611	3.24e-05	0.00101981
LGR4	4786.89	-0.635461	0.179881	-3.53268	0.000411377	0.00695449
LOC111092404	551.489	-0.634453	0.138182	-4.59143	4.4e-06	0.000207573
MINDY1	3040.93	-0.631373	0.14771	-4.27441	1.92e-05	0.000664709
UHRF2	1139.93	-0.629363	0.15574	-4.04112	5.32e-05	0.00148365
SP1	6416.05	-0.62861	0.163581	-3.84282	0.00012163	0.00277977
CXADR	4046.21	-0.626849	0.15747	-3.98075	6.87e-05	0.00181318
ZDHHC24	330.181	-0.62502	0.158391	-3.94605	7.95e-05	0.00202062
SPECC1	1392.85	-0.623652	0.152429	-4.09144	4.29e-05	0.00127102
ACOX3	475.824	-0.622943	0.181904	-3.42458	0.00061576	0.00941165
PCGF3	985.925	-0.621839	0.115258	-5.39517	6.85e-08	7.23e-06
COLEC12	1869.42	-0.620006	0.163072	-3.80205	0.000143506	0.0031564
DNAJC18	841.514	-0.618504	0.127388	-4.85529	1.2e-06	7.29e-05
COPS9	629.163	-0.617871	0.176749	-3.49576	0.000472706	0.00770645
STK36	480.948	-0.617412	0.149564	-4.12807	3.66e-05	0.00111669
AFAP1L2	1430.14	-0.617107	0.115998	-5.31999	1.04e-07	1.01e-05
AHNAK	89720	-0.615966	0.173914	-3.54179	0.000397429	0.00677822
RFX3	606.283	-0.614849	0.149143	-4.12254	3.75e-05	0.00113904
POMT2	349.883	-0.611208	0.115663	-5.28441	1.26e-07	1.2e-05
GGCX	3023.32	-0.610182	0.152231	-4.00826	6.12e-05	0.00164451
ALDH2	4956.54	-0.609967	0.16628	-3.66832	0.00024415	0.00473985
ZNF341	355.888	-0.607406	0.160738	-3.77886	0.000157546	0.00338271
STOML2	1020.53	-0.605018	0.168545	-3.58966	0.000331108	0.00592735
ASL	795.149	-0.604213	0.161081	-3.751	0.000176133	0.00369743
KIAA0930	3971.44	-0.603888	0.142701	-4.23183	2.32e-05	0.000776511
ARMC5	237.226	-0.603145	0.163651	-3.68557	0.000228195	0.00450211
SAMD8	1305.99	-0.601172	0.151102	-3.97858	6.93e-05	0.00182318
ARL10	534.622	-0.600967	0.166202	-3.61589	0.000299321	0.00551228
TMEM159	4422.15	-0.600729	0.108293	-5.54725	2.9e-08	3.63e-06
LIPH	704.698	-0.598073	0.151225	-3.95486	7.66e-05	0.00196143
MICAL2	1465.46	-0.596153	0.11071	-5.38481	7.25e-08	7.51e-06
HDAC5	2962.97	-0.593697	0.141202	-4.20458	2.62e-05	0.000852562
POC1B	280.676	-0.593047	0.165797	-3.57694	0.000347644	0.0061471
CALM3	2116.61	-0.592017	0.16309	-3.63001	0.000283412	0.00528784
LOC100688190	667.645	-0.591443	0.155586	-3.80138	0.000143894	0.00316172
LOC106559648	1028.23	-0.590161	0.161943	-3.64424	0.000268178	0.00507817
AKAP12	3125.33	-0.589459	0.168979	-3.48836	0.000485988	0.00785529
SUN1	5774.79	-0.58871	0.154759	-3.80404	0.000142355	0.00313426
ANP32A	3235.39	-0.588131	0.15817	-3.71834	0.000200539	0.00406012
CDKN2AIP	1253.44	-0.58779	0.16612	-3.53835	0.000402635	0.00684543
FYN	1960.29	-0.586705	0.164982	-3.55617	0.000376294	0.00650394
RNASEH2A	348.857	-0.58567	0.130545	-4.48636	7.24e-06	0.000308061
HNRNPH1	15100.4	-0.58125	0.136728	-4.25116	2.13e-05	0.000723707
FAM234B	520.189	-0.581208	0.143594	-4.04759	5.17e-05	0.00145264
C5H1orf123	1617.55	-0.581116	0.138643	-4.19144	2.77e-05	0.000900767
UST	2383.67	-0.58093	0.135816	-4.27732	1.89e-05	0.000658192
SEMA4F	633.232	-0.576455	0.136143	-4.23419	2.29e-05	0.000770122
LIMD1	1801.45	-0.575418	0.149295	-3.85424	0.000116091	0.00268722
TMEM39B	183.302	-0.574693	0.161587	-3.55655	0.000375763	0.0065009
NPDC1	132.319	-0.572062	0.159289	-3.59134	0.000328978	0.00590387
AMMECR1	976.684	-0.571887	0.157028	-3.64195	0.000270585	0.00510572
FARP2	565.531	-0.570496	0.136293	-4.18582	2.84e-05	0.000921963
ATG4B	1345.68	-0.568615	0.141118	-4.02937	5.59e-05	0.0015356
MCCC1	1168.71	-0.567828	0.145738	-3.89622	9.77e-05	0.00236799
EPHB3	2126.18	-0.56771	0.156671	-3.62359	0.000290548	0.00537463
ING4	1216.69	-0.566907	0.140502	-4.03487	5.46e-05	0.00150819
ZNF862	522.174	-0.565966	0.115699	-4.89173	1e-06	6.2e-05
HCFC1R1	383.995	-0.565439	0.124509	-4.54136	5.59e-06	0.000250973
GATC	687.268	-0.564935	0.137636	-4.10457	4.05e-05	0.00121594
AFDN	9510.3	-0.564229	0.120831	-4.66957	3.02e-06	0.000150517
LOC403555	346.157	-0.56104	0.137636	-4.07625	4.58e-05	0.00133138
SMARCC2	3191.23	-0.560906	0.146227	-3.83587	0.00012512	0.00282964
EXT2	2395.97	-0.555588	0.144097	-3.85565	0.000115424	0.00267752
RAI14	3304.35	-0.554754	0.136672	-4.05903	4.93e-05	0.00140145
RPRD1A	754.957	-0.553716	0.133486	-4.14811	3.35e-05	0.00104546
EPS15	4119.04	-0.552029	0.130203	-4.23975	2.24e-05	0.000755551
RECQL5	488.759	-0.551655	0.153934	-3.58371	0.000338746	0.00602917
DDX39B	2980.14	-0.550765	0.150522	-3.65903	0.000253169	0.00487674
ILK	2841.57	-0.549867	0.0935981	-5.87476	4.23e-09	7.39e-07
CHN2	429.339	-0.545185	0.15174	-3.5929	0.000327024	0.00587855
MTURN	2433.43	-0.544375	0.155689	-3.49656	0.000471302	0.00770422
CNPY4	1495.51	-0.540981	0.139056	-3.89037	0.000100091	0.00241232
RALY	1311.94	-0.540742	0.134647	-4.01599	5.92e-05	0.00160551
GCFC2	413.358	-0.539727	0.146883	-3.67454	0.000238274	0.00465851
CAMKMT	148.327	-0.537588	0.123576	-4.35027	1.36e-05	0.000509123
ZBTB40	1388	-0.533401	0.126295	-4.22344	2.41e-05	0.000796231
BBS7	581.415	-0.533255	0.139357	-3.82653	0.000129961	0.00292385
IRX1	615.714	-0.531672	0.13565	-3.91943	8.88e-05	0.00219296
FTO	1254.74	-0.529871	0.135433	-3.91241	9.14e-05	0.00223978
U2SURP	1940.19	-0.529795	0.13512	-3.92091	8.82e-05	0.00218446
LSM14B	2787.75	-0.528657	0.141458	-3.73721	0.000186075	0.00383545
FBXO42	1394.39	-0.526981	0.139478	-3.77825	0.000157936	0.00338771
RPL22	2507.23	-0.525328	0.129082	-4.06972	4.71e-05	0.00135274
DYRK2	1545.38	-0.524284	0.105934	-4.94915	7.45e-07	4.9e-05
SMG6	1083.85	-0.52372	0.142594	-3.67279	0.000239912	0.0046863
THRA	1495.11	-0.522825	0.145267	-3.59907	0.000319358	0.00580341
MTIF2	573.402	-0.52261	0.119574	-4.3706	1.24e-05	0.000474631
SYTL4	583.174	-0.52195	0.110794	-4.71099	2.47e-06	0.000130131
MAPKBP1	1421.32	-0.520834	0.143638	-3.62601	0.000287829	0.00535077
STXBP3	2367.18	-0.520283	0.146974	-3.53998	0.000400162	0.00681409
EPCAM	2946.18	-0.518911	0.137896	-3.76307	0.000167843	0.00356839
DDR1	5040.23	-0.516486	0.151387	-3.4117	0.000645595	0.00975741
TSPAN6	544.856	-0.515415	0.113915	-4.52455	6.05e-06	0.000269532
STXBP4	424.474	-0.513881	0.150319	-3.41861	0.000629428	0.0095464
PAFAH1B3	567.166	-0.512946	0.136533	-3.75693	0.000172012	0.00364272
WDR6	1251.26	-0.505514	0.141951	-3.56119	0.000369181	0.00640753
SH2D4A	729.245	-0.505335	0.126504	-3.99462	6.48e-05	0.00173135
ALS2	1862.1	-0.504934	0.143496	-3.5188	0.00043351	0.00722944
XRCC1	774.881	-0.503398	0.131074	-3.84057	0.000122748	0.002795
OCLN	1454.91	-0.502085	0.130031	-3.86127	0.0001128	0.00263927
GLCCI1	494.933	-0.499781	0.120945	-4.13232	3.59e-05	0.00110156
CTNNB1	20928.2	-0.49805	0.139926	-3.55938	0.000371729	0.00644434
RAD51B	111.706	-0.497676	0.144421	-3.44602	0.000568907	0.00882009
C18H11orf74	2032.41	-0.497602	0.12874	-3.86516	0.000111016	0.00261166
THTPA	811.287	-0.496244	0.103819	-4.7799	1.75e-06	9.83e-05
ME2	846.516	-0.495845	0.136468	-3.63341	0.000279698	0.00523208
PANK2	671.944	-0.495179	0.125478	-3.94635	7.94e-05	0.00202045
OTUD1	970.884	-0.494567	0.138589	-3.56859	0.000358914	0.00628986
APLP1	236.359	-0.494169	0.133819	-3.69283	0.000221771	0.00440752
SNAPC3	361.472	-0.492348	0.0871187	-5.65146	1.59e-08	2.18e-06
TMEM218	284.442	-0.490799	0.135343	-3.62633	0.000287478	0.00535077
LOC100685427	553.366	-0.488465	0.11832	-4.12834	3.65e-05	0.00111669
PCMTD1	4270.67	-0.486047	0.134124	-3.62388	0.000290219	0.00537315
ZNF252	666.907	-0.484598	0.11768	-4.11792	3.82e-05	0.00115401
LRSAM1	740.616	-0.478203	0.134083	-3.56648	0.000361811	0.00632527
EIF2AK4	1255.19	-0.47675	0.136244	-3.49924	0.000466582	0.00766179
PUS10	524.872	-0.476296	0.133491	-3.56801	0.000359704	0.0062986
2020-09-10	3633.79	-0.475102	0.130559	-3.63898	0.000273716	0.00514685
GALNT18	451.133	-0.47316	0.130878	-3.61527	0.000300031	0.00551705
EPB41L4B	901.277	-0.471081	0.136985	-3.43892	0.000584042	0.00899034
GFM2	544.709	-0.469062	0.119441	-3.92715	8.6e-05	0.00213346
GDI1	3924.7	-0.468452	0.135814	-3.44923	0.000562191	0.00873474
CD164	12562.1	-0.467858	0.123443	-3.79007	0.000150603	0.00327228
BPGM	1004.71	-0.465401	0.095165	-4.89046	1.01e-06	6.22e-05
ATP11A	2525.02	-0.464176	0.112876	-4.11228	3.92e-05	0.0011793
EFS	1779.39	-0.462265	0.104911	-4.40626	1.05e-05	0.000417646
CDC14A	657.9	-0.461664	0.128578	-3.59054	0.000329989	0.00591221
GTDC1	290.94	-0.459481	0.116458	-3.94547	7.96e-05	0.00202317
MEGF8	1155.39	-0.457059	0.129784	-3.52168	0.000428824	0.00718347
PHF14	1167.72	-0.455587	0.117932	-3.86314	0.00011194	0.00262483
KCTD11	990.442	-0.455232	0.127673	-3.56561	0.00036301	0.0063411
LYRM1	440.931	-0.451928	0.126264	-3.57923	0.000344611	0.00611345
MTERF4	2066.77	-0.451689	0.10931	-4.13219	3.59e-05	0.00110156
ATF6B	2214.7	-0.446305	0.122484	-3.64378	0.00026866	0.00507826
ZC3H11A	5493.67	-0.439909	0.113641	-3.87104	0.00010837	0.00255774
CLUAP1	483.508	-0.43661	0.115666	-3.77475	0.000160171	0.00342886
YTHDC2	1645.45	-0.42634	0.119513	-3.5673	0.000360678	0.00631054
YME1L1	9180.8	-0.421576	0.104257	-4.04362	5.26e-05	0.00147172
TULP3	1463.32	-0.421568	0.113433	-3.71645	0.000202044	0.00408296
LMAN2	2848.6	-0.417767	0.0954658	-4.37609	1.21e-05	0.000465304
SCARB2	7806.66	-0.413018	0.108862	-3.79395	0.000148269	0.00323486
PIP4K2B	3280.54	-0.411379	0.109898	-3.74328	0.000181637	0.00377751
ZNF436	2835.63	-0.407747	0.116647	-3.49558	0.000473038	0.00770645
PJA1	639.202	-0.404926	0.113149	-3.57869	0.000345325	0.00612111
PPWD1	1040.32	-0.398497	0.102495	-3.88795	0.000101095	0.00243012
2020-03-08	4029.33	-0.385659	0.112322	-3.4335	0.000595832	0.0091523
RBMS2	793.001	-0.385133	0.0885098	-4.3513	1.35e-05	0.000507622
CLIP2	1263.53	-0.382508	0.0997839	-3.83336	0.000126404	0.00285272
GLT8D1	854.909	-0.375225	0.100424	-3.7364	0.000186673	0.00384046
MLH1	920.755	-0.358586	0.0868942	-4.12669	3.68e-05	0.00112183
NUP133	1452.12	-0.357554	0.0876563	-4.07905	4.52e-05	0.001319
SIKE1	647.346	-0.353073	0.096854	-3.64542	0.000266957	0.00506821
SNX1	2192.94	-0.326155	0.0946701	-3.44517	0.000570698	0.00884154
FBXO18	1229.61	-0.314567	0.0886147	-3.54982	0.000385492	0.0066111
LOC610615	2294.54	-0.313832	0.0727489	-4.31391	1.6e-05	0.000577609
TSR2	898.307	-0.311515	0.0830107	-3.75271	0.00017493	0.00368648
TRIP4	940.309	-0.311368	0.0810602	-3.8412	0.000122434	0.00279224
NSMAF	1666.74	-0.302068	0.0839755	-3.59709	0.000321791	0.00582806
PIGT	1386.9	-0.293887	0.0847048	-3.46954	0.000521343	0.0082447
COPS8	1164.39	-0.292701	0.083691	-3.4974	0.000469812	0.00769148
SNAP47	421.835	-0.288506	0.0828062	-3.48412	0.000493766	0.00793318
SMIM7	2874.85	-0.280894	0.0706013	-3.9786	6.93e-05	0.00182318
GMPR2	743.354	-0.265504	0.0751573	-3.53264	0.000411438	0.00695449
ESD	1381.09	0.262157	0.0718292	3.64972	0.000262521	0.00500771
TBK1	1763.47	0.284788	0.0821129	3.46825	0.00052386	0.00824574
STRADA	890.561	0.286734	0.0727632	3.94065	8.13e-05	0.00205646
PAPD4	2170.79	0.294956	0.0856651	3.44312	0.00057504	0.00888971
ACTR3	10703.6	0.29748	0.0821461	3.62135	0.000293068	0.00540739
ERLEC1	2888.71	0.307617	0.0838874	3.66702	0.00024539	0.00475894
ATIC	1972.43	0.317672	0.0857862	3.70307	0.000213008	0.00424896
EBAG9	781.806	0.323352	0.0743519	4.34894	1.37e-05	0.000510302
KCTD2	3399.43	0.331974	0.0805429	4.12171	3.76e-05	0.00114156
NFATC2IP	1056.72	0.332398	0.0869389	3.82335	0.00013165	0.00295263
PSMF1	4098.44	0.33832	0.0828167	4.08517	4.4e-05	0.00128994
PTDSS1	1471.85	0.340625	0.0995113	3.42297	0.000619399	0.00945599
UGCG	1371.08	0.342731	0.0903993	3.7913	0.000149863	0.00326636
TSPAN17	3997.8	0.3437	0.0927822	3.70438	0.000211912	0.00423492
ABCD3	6018.16	0.352579	0.0981538	3.5921	0.000328018	0.00589153
GPS1	1909.57	0.364874	0.100623	3.62613	0.000287695	0.00535077
OTULIN	1624.27	0.367037	0.100817	3.64063	0.000271969	0.00512291
RBBP9	1496.07	0.368459	0.106039	3.47476	0.000511304	0.00813688
VAMP7	2894.47	0.3688	0.106012	3.47885	0.000503577	0.00803755
AP1M1	1355.6	0.371579	0.107416	3.45926	0.000541652	0.00845204
WDR25	302.506	0.372618	0.104792	3.55579	0.000376839	0.00650394
PGAM5	789.714	0.378723	0.0952983	3.97408	7.07e-05	0.00184677
SLC25A46	2199.76	0.380672	0.110209	3.4541	0.000552136	0.00859703
PSME1	1907.05	0.383387	0.104931	3.65371	0.000258474	0.00494184
SAP18	1379.07	0.390076	0.110424	3.53252	0.00041162	0.00695449
FANCD2	754.957	0.39603	0.0967134	4.09489	4.22e-05	0.00125743
NMD3	2250.76	0.398506	0.103773	3.84018	0.000122942	0.002795
KIAA1468	1965.98	0.39874	0.0979155	4.07229	4.66e-05	0.00134519
LOC100688940	550.626	0.400401	0.0989496	4.04651	5.2e-05	0.00145743
MRS2	1198.06	0.40213	0.0884447	4.54668	5.45e-06	0.000248841
NUP85	1097.28	0.402185	0.0996587	4.03562	5.45e-05	0.00150528
NUDT9	1357.53	0.40454	0.100916	4.00868	6.11e-05	0.00164367
GLMN	1124.27	0.405402	0.0867412	4.67369	2.96e-06	0.000149596
SNUPN	1153.55	0.406779	0.116049	3.50524	0.000456195	0.00752548
ZDHHC7	2346.4	0.410972	0.110383	3.72314	0.000196759	0.00399855
ATAD3A	926.806	0.414572	0.115105	3.60169	0.000316151	0.00575479
GMPS	2420.68	0.415305	0.110716	3.75109	0.000176069	0.00369743
DNM2	4654.36	0.419405	0.112103	3.74125	0.000183104	0.00379591
SUCLG2	4415.25	0.42185	0.0773682	5.4525	4.97e-08	5.72e-06
TBC1D20	2128.33	0.422753	0.0752727	5.61629	1.95e-08	2.64e-06
OSBPL11	1953.86	0.425544	0.122126	3.48448	0.000493102	0.00792883
STXBP5	1864.43	0.426183	0.0986663	4.31944	1.56e-05	0.000566084
FAM151B	2306.48	0.428347	0.112431	3.80986	0.000139045	0.00306763
RNF13	2478.74	0.428732	0.111334	3.85085	0.000117708	0.00271306
RAB5A	2783.07	0.429475	0.0935684	4.58995	4.43e-06	0.000208291
RNF167	961.782	0.429628	0.119324	3.60051	0.000317588	0.00577609
BBS10	305.06	0.436801	0.124868	3.49811	0.00046856	0.00767679
PPP1CC	3970.73	0.439963	0.128534	3.42291	0.000619535	0.00945599
AMACR	1959.29	0.440906	0.127369	3.46165	0.000536875	0.00840173
MRPL2	634.125	0.440942	0.123274	3.57694	0.000347644	0.0061471
TTC8	215.201	0.442148	0.12719	3.47629	0.000508409	0.00809676
VDAC1	3784.03	0.44677	0.0845697	5.28286	1.27e-07	1.2e-05
LOC102154192	265.71	0.448162	0.127737	3.50849	0.000450658	0.0074683
USP14	2417.99	0.448979	0.119462	3.75834	0.000171043	0.00362573
NDFIP2	4649.24	0.454156	0.115214	3.94186	8.09e-05	0.00204902
TIGD2	352.883	0.455315	0.12958	3.51377	0.000441798	0.00733832
PLAA	1981.61	0.458218	0.10034	4.56667	4.96e-06	0.000229656
NSF	2030.54	0.458557	0.124941	3.67017	0.000242386	0.00471759
APTX	615.347	0.458877	0.110737	4.14384	3.42e-05	0.00105616
SETD3	1985.62	0.463198	0.103154	4.49035	7.11e-06	0.000302943
FPGT	487.715	0.464069	0.098943	4.69027	2.73e-06	0.000140265
SMAP1	1028.31	0.469617	0.11894	3.94835	7.87e-05	0.00201076
CLCN4	615.417	0.469867	0.137849	3.40857	0.000653037	0.009863
AP1S1	2003.7	0.471942	0.135548	3.48172	0.000498196	0.00798378
LOC611209	2625.13	0.472545	0.136318	3.4665	0.000527279	0.00827549
FBXO45	1157.22	0.474805	0.13161	3.60765	0.000308983	0.00565284
ARFGAP3	2692.75	0.476883	0.121023	3.94043	8.13e-05	0.00205646
ACAA2	6333.33	0.477045	0.110183	4.32955	1.49e-05	0.000545765
RDH11	2037.53	0.478515	0.115535	4.14174	3.45e-05	0.00106267
PEX13	2250.59	0.480098	0.136095	3.52767	0.00041924	0.00705569
MSTO1	498.95	0.48021	0.140316	3.42236	0.000620807	0.00946874
MTERF3	1065.92	0.484717	0.123545	3.92339	8.73e-05	0.00216458
TMEM63B	2268.96	0.484995	0.124761	3.88738	0.00010133	0.00243012
CMPK1	3715.54	0.486233	0.125203	3.88356	0.000102937	0.00245359
LOC491134	322.102	0.486237	0.139959	3.47413	0.000512518	0.00815021
RAP1GDS1	1376.71	0.486276	0.119811	4.0587	4.93e-05	0.00140158
LACTB2	2424.89	0.489099	0.096354	5.07607	3.85e-07	2.94e-05
SLC25A3	4946.1	0.489589	0.107564	4.55161	5.32e-06	0.000244624
LOC106559724	257.191	0.494082	0.128348	3.84956	0.00011833	0.00272449
GALM	1155.07	0.494334	0.122676	4.02961	5.59e-05	0.0015356
KLHL18	915.52	0.496362	0.125503	3.95497	7.65e-05	0.00196143
NT5C2	2331.95	0.499721	0.100525	4.97111	6.66e-07	4.47e-05
CARS2	395.945	0.499953	0.139611	3.58104	0.000342227	0.00607614
NMI	1314.38	0.506581	0.146921	3.44799	0.000564771	0.00876854
IFNLR1	666.484	0.507209	0.137246	3.69561	0.000219362	0.00436767
NXPE3	966.08	0.508234	0.136386	3.72643	0.000194207	0.00396157
MOCS2	1109.94	0.516646	0.141338	3.65538	0.000256802	0.00491421
LOC483802	688.784	0.517348	0.124641	4.1507	3.31e-05	0.00103968
ADIPOR1	4374.57	0.519232	0.116869	4.44286	8.88e-06	0.000360468
ACAD9	2323.72	0.522462	0.108221	4.82775	1.38e-06	8.08e-05
SOCS2	969.518	0.523825	0.15311	3.42124	0.000623361	0.0094943
IFT57	460.018	0.527514	0.141129	3.73782	0.000185626	0.00383091
PDK3	888.207	0.528816	0.148997	3.54918	0.000386432	0.00661674
TNIP1	2530.07	0.528821	0.148796	3.55399	0.000379436	0.00652794
MYO19	937.079	0.531812	0.12337	4.31072	1.63e-05	0.000582128
ACTR3B	466.261	0.5344	0.11675	4.57728	4.71e-06	0.000220198
SLC25A1	1608.85	0.536572	0.153452	3.49669	0.000471073	0.00770422
AMN1	418.476	0.537046	0.124015	4.33049	1.49e-05	0.000544832
SLC35F2	881.451	0.539144	0.151893	3.54951	0.000385953	0.00661375
ACAT1	4019.11	0.541388	0.119388	4.53468	5.77e-06	0.000257977
LGALS4	1005.32	0.542198	0.157609	3.44014	0.000581419	0.00896271
RAD9A	443.71	0.546086	0.151851	3.59618	0.00032292	0.0058434
PSMG1	1482.95	0.54855	0.125076	4.38572	1.16e-05	0.000451619
DGAT1	1011.26	0.549975	0.161429	3.40693	0.000656984	0.0099157
SFMBT1	926.401	0.550478	0.154472	3.56361	0.000365785	0.00637413
HMOX2	1310.97	0.553037	0.145926	3.78985	0.00015074	0.00327228
PEX7	1187.15	0.553802	0.121771	4.54791	5.42e-06	0.000247915
LACTB	826.672	0.558209	0.112308	4.97033	6.68e-07	4.48e-05
ST6GALNAC2	552.643	0.559021	0.149009	3.75158	0.000175723	0.00369598
PSMG2	1001.06	0.563044	0.0923725	6.09537	1.09e-09	2.29e-07
BBS2	1191.89	0.570555	0.156492	3.64591	0.000266446	0.00506294
SLC39A11	592.322	0.57094	0.155228	3.67806	0.000235012	0.00461558
LOC481650	303.172	0.571928	0.149828	3.81723	0.00013496	0.00299892
SLC25A16	1352.35	0.571951	0.159373	3.58876	0.000332255	0.00594296
TRIM8	454.139	0.575233	0.123624	4.65309	3.27e-06	0.000161947
BLVRA	905.907	0.576283	0.165041	3.49176	0.000479849	0.0077793
NUDT6	124.579	0.576916	0.158319	3.64401	0.000268421	0.00507817
CMSS1	343.545	0.578952	0.143691	4.02914	5.6e-05	0.0015356
PLPP6	1474.97	0.579708	0.133616	4.33862	1.43e-05	0.000530459
SLC11A2	1115.29	0.581358	0.107252	5.42047	5.94e-08	6.46e-06
RHBG	1421.03	0.583953	0.165173	3.53541	0.000407141	0.00690036
PLBD2	2218.54	0.584684	0.124128	4.71032	2.47e-06	0.000130207
B3GNT5	561.253	0.587531	0.164326	3.57541	0.000349684	0.00617309
WWOX	1093.95	0.587988	0.155717	3.776	0.00015937	0.00341508
LOC111096315	235.937	0.590395	0.160771	3.67227	0.000240404	0.00468945
TK1	426.231	0.590659	0.166317	3.5514	0.000383188	0.00657679
NOL6	1101.05	0.591138	0.132799	4.45137	8.53e-06	0.000349747
TMEM43	11769.7	0.592059	0.168043	3.52325	0.000426291	0.00715211
PDK2	597.425	0.59211	0.157947	3.74878	0.000177694	0.00372297
ZFP30	769.087	0.593969	0.13223	4.49193	7.06e-06	0.000302164
KIAA0895	405.304	0.599354	0.168393	3.55926	0.000371898	0.00644434
MPPE1	1045.23	0.599391	0.128299	4.67183	2.99e-06	0.00015026
LZTS3	338.389	0.600434	0.132582	4.52878	5.93e-06	0.000264735
LOC608816	138.262	0.600792	0.156009	3.851	0.000117636	0.00271306
BEX4	491.818	0.602607	0.110026	5.47695	4.33e-08	5.12e-06
NSDHL	708.349	0.608558	0.112951	5.38782	7.13e-08	7.42e-06
RIOK3	3152.43	0.610413	0.105336	5.7949	6.84e-09	1.09e-06
MAPRE2	1703.52	0.610481	0.169461	3.6025	0.000315177	0.00574674
LOC102155998	177.708	0.613162	0.164812	3.72037	0.000198934	0.00403517
DUOX1	2060.76	0.616056	0.158703	3.88182	0.000103678	0.00246854
CYB5R4	905.545	0.616419	0.131031	4.70438	2.55e-06	0.000132163
ABCB6	931.345	0.617157	0.147043	4.19712	2.7e-05	0.000879819
THUMPD2	151.154	0.618492	0.173266	3.56961	0.00035751	0.00627033
GRHL3	1149.2	0.619956	0.118852	5.21623	1.83e-07	1.63e-05
PRADC1	433.736	0.62202	0.152445	4.08029	4.5e-05	0.00131555
RWDD2A	130.433	0.62316	0.145193	4.29194	1.77e-05	0.00062479
LOC111090401	530.37	0.623821	0.109592	5.69222	1.25e-08	1.77e-06
SETD4	349.571	0.634128	0.177398	3.57461	0.000350754	0.00618189
KYAT3	483.06	0.635146	0.113838	5.57937	2.41e-08	3.15e-06
RBP1	562.551	0.636183	0.178546	3.56313	0.000366466	0.00637638
EMCN	506.365	0.63871	0.149403	4.27509	1.91e-05	0.000663754
LOC100683001	1377.13	0.642108	0.139472	4.60385	4.15e-06	0.000198151
LOC100856034	551.463	0.644899	0.145351	4.43683	9.13e-06	0.000367946
KBTBD8	227.027	0.646018	0.160752	4.01873	5.85e-05	0.00158893
LOC608110	1428.22	0.647026	0.0769077	8.41302	4e-17	5.77e-14
PKM	9069.77	0.649866	0.154217	4.21397	2.51e-05	0.000820361
ZNF551	449.971	0.653466	0.145895	4.47902	7.5e-06	0.000318227
LOC100686969	70.3746	0.657143	0.185341	3.54558	0.000391746	0.00668656
TIPARP	1534.85	0.664618	0.168809	3.9371	8.25e-05	0.00207794
TUBA8	484.151	0.666527	0.171489	3.8867	0.000101615	0.00243012
LOC102152638	125.135	0.670287	0.190918	3.51086	0.00044666	0.00740771
POC1A	301.739	0.671425	0.183294	3.66311	0.000249176	0.0048151
RGN	332.092	0.672338	0.184221	3.64963	0.000262623	0.00500771
HOPX	21004.5	0.673634	0.192024	3.50806	0.000451383	0.00747458
LOC102152005	2060.99	0.675113	0.193616	3.48687	0.0004887	0.00787862
CTPS2	686.387	0.677197	0.123406	5.48754	4.08e-08	4.87e-06
ORAI2	539.47	0.677564	0.15143	4.47444	7.66e-06	0.000323853
GALNT6	981.003	0.678022	0.163663	4.1428	3.43e-05	0.00105928
LRP11	817.03	0.680478	0.172892	3.93584	8.29e-05	0.0020813
LOC100856617	2195.33	0.681718	0.129022	5.28372	1.27e-07	1.2e-05
MTX2	1566.67	0.684677	0.20026	3.41895	0.000628637	0.00954109
CNNM4	892.225	0.685593	0.145662	4.70674	2.52e-06	0.00013105
PRMT9	1137.06	0.685719	0.119431	5.74157	9.38e-09	1.39e-06
HSD17B7	1341.35	0.686949	0.142642	4.81589	1.47e-06	8.55e-05
DLA-12	2379.53	0.690394	0.185362	3.72457	0.000195647	0.00398344
RPL26	531.104	0.690808	0.163038	4.23709	2.26e-05	0.000762172
ACE2	1313.01	0.691059	0.148128	4.6653	3.08e-06	0.000153329
P2RX4	541.665	0.694342	0.19377	3.58332	0.000339249	0.00603316
ESRRA	1145.18	0.695713	0.13126	5.30028	1.16e-07	1.11e-05
LOC100683303	298.947	0.696632	0.163111	4.27092	1.95e-05	0.000674063
MPP7	2839.44	0.697061	0.154426	4.51389	6.36e-06	0.00027886
IFRD1	2740.98	0.6976	0.169498	4.11569	3.86e-05	0.00116362
ANO1	824.705	0.699956	0.0830378	8.42937	3.48e-17	5.37e-14
DHCR24	6922.41	0.701309	0.180485	3.8857	0.000102035	0.00243746
TRMT11	594.099	0.701884	0.136231	5.15216	2.57e-07	2.12e-05
MECOM	230.096	0.702483	0.205394	3.42017	0.000625827	0.00951846
EEF1A1	12048.5	0.707038	0.123112	5.74304	9.3e-09	1.39e-06
SVIP	992.866	0.711701	0.165096	4.31082	1.63e-05	0.000582128
AK3	690.415	0.711725	0.193913	3.67032	0.000242245	0.00471759
CYP51A1	1933.52	0.711741	0.153369	4.64071	3.47e-06	0.000170401
NQO2	380.055	0.71253	0.175615	4.05733	4.96e-05	0.00140611
MND1	115.657	0.712692	0.177951	4.00498	6.2e-05	0.00166543
ADGRL4	763.332	0.713204	0.180127	3.95944	7.51e-05	0.00193128
DHCR7	2100.76	0.718958	0.208076	3.45527	0.000549746	0.00856598
LOC100688793	127.052	0.719526	0.207531	3.46708	0.000526145	0.00826968
LOC607205	1567.07	0.722172	0.175233	4.1212	3.77e-05	0.00114247
LOC111098550	49.1246	0.724243	0.198745	3.64408	0.000268353	0.00507817
GK	795.691	0.725993	0.115419	6.29006	3.17e-10	8.48e-08
KBTBD12	185.424	0.727252	0.179664	4.04784	5.17e-05	0.00145264
TMEM205	453.666	0.730254	0.15821	4.61573	3.92e-06	0.000188814
PRDX5	2100.92	0.731019	0.20815	3.51198	0.000444784	0.00738226
SFMBT2	253.775	0.732758	0.209043	3.5053	0.000456097	0.00752548
SLC16A5	487.565	0.736781	0.153292	4.80639	1.54e-06	8.82e-05
QPCTL	361.282	0.738229	0.132418	5.57498	2.48e-08	3.19e-06
OSMR	2325.42	0.744812	0.178263	4.17816	2.94e-05	0.000947893
MSRA	513.096	0.748369	0.164342	4.55373	5.27e-06	0.000242691
YOD1	6170.12	0.748579	0.163694	4.57305	4.81e-06	0.00022421
CABCOCO1	152.93	0.751597	0.206318	3.64291	0.000269577	0.00509115
TOP3B	2356.64	0.753819	0.139583	5.40053	6.64e-08	7.08e-06
FAS	315.29	0.755199	0.216527	3.48778	0.000487049	0.00786071
AGPAT1	973.712	0.755558	0.130354	5.79621	6.78e-09	1.09e-06
PCP4L1	178.169	0.756989	0.190472	3.97428	7.06e-05	0.00184677
SLC39A2	777.578	0.757516	0.176513	4.29155	1.77e-05	0.00062479
ELOVL7	4097.55	0.758462	0.185427	4.09035	4.31e-05	0.00127315
MGMT	61.969	0.758563	0.215565	3.51896	0.000433243	0.00722944
LOC489516	428.664	0.760687	0.165069	4.6083	4.06e-06	0.000194393
DDIT4L	309.547	0.761301	0.170307	4.47016	7.82e-06	0.000328475
HSD17B6	310.914	0.761863	0.149784	5.08641	3.65e-07	2.83e-05
PELI3	367.236	0.764063	0.112839	6.77129	1.28e-11	5.98e-09
LOC102154710	44.7354	0.764084	0.201207	3.7975	0.000146161	0.00319646
SELENOS	1260.68	0.766263	0.15021	5.10129	3.37e-07	2.66e-05
PLPP1	2863.42	0.76628	0.160132	4.78529	1.71e-06	9.65e-05
UBASH3B	1234.06	0.769151	0.162318	4.73854	2.15e-06	0.000115896
TMEM41B	2421.42	0.771255	0.185243	4.16348	3.13e-05	0.00099175
C7H18orf21	451.251	0.77389	0.204542	3.78352	0.000154624	0.00334653
ACER1	3699.95	0.774234	0.190775	4.05836	4.94e-05	0.00140177
TXNDC11	1506.71	0.77697	0.122579	6.33854	2.32e-10	6.91e-08
LSS	1769.09	0.779687	0.207448	3.75847	0.000170958	0.00362573
NCR3LG1	334.714	0.779948	0.163757	4.76285	1.91e-06	0.000105118
LOC102153215	550.325	0.78105	0.224954	3.47205	0.0005165	0.00819008
CACNB2	137.205	0.783725	0.229356	3.41706	0.000633009	0.00958728
P2RY2	1177.3	0.791076	0.161532	4.89734	9.71e-07	6.08e-05
KCNK1	384.26	0.793863	0.18318	4.33378	1.47e-05	0.000539506
IL10RA	373.25	0.793944	0.207837	3.82003	0.000133433	0.00297415
PSMB8	304.082	0.794655	0.21822	3.64153	0.000271019	0.00510947
LOC111098495	71.0938	0.79526	0.218504	3.63956	0.000273102	0.00513977
DLA-64	2047.44	0.796032	0.222604	3.57601	0.000348883	0.00616399
2020-09-05	4177.74	0.797341	0.229829	3.46927	0.000521866	0.0082447
LOC106559042	68.9033	0.797941	0.228603	3.49051	0.000482101	0.00780996
S1PR1	536.286	0.800556	0.218331	3.66672	0.000245686	0.00476041
RBM47	747.252	0.802367	0.165787	4.83974	1.3e-06	7.67e-05
LOC102157096	57.9611	0.805435	0.219335	3.67216	0.000240507	0.00468945
NMNAT3	149.771	0.808096	0.237365	3.40444	0.000662996	0.00999945
ACTL7A	99.4378	0.808863	0.221823	3.64643	0.000265905	0.00506154
SDCBP2	238.083	0.811382	0.205471	3.94889	7.85e-05	0.00200864
SLC7A7	84.4839	0.812071	0.228913	3.54751	0.000388891	0.00664832
KCNK7	596.465	0.81226	0.190199	4.27058	1.95e-05	0.000674063
LOC106559694	882.541	0.815513	0.208065	3.91951	8.87e-05	0.00219296
SOX7	889.95	0.818917	0.171545	4.77379	1.81e-06	0.000100331
ALAS1	2947.89	0.820833	0.161167	5.09305	3.52e-07	2.76e-05
PGF	232.344	0.821882	0.230562	3.56469	0.000364287	0.00635828
TAF4B	204.759	0.825155	0.193878	4.25605	2.08e-05	0.000710302
CFB	91.6331	0.827146	0.229863	3.59842	0.000320151	0.00580807
MSMO1	1492.19	0.82766	0.159635	5.1847	2.16e-07	1.84e-05
KHK	220.91	0.827865	0.22476	3.68332	0.000230212	0.00453777
FAM53A	96.3	0.836311	0.222907	3.75185	0.000175538	0.00369568
GAPDH	5253.12	0.83793	0.187745	4.46312	8.08e-06	0.000337485
CMC1	679.749	0.838257	0.145207	5.77282	7.8e-09	1.21e-06
TSPAN11	1958.72	0.838959	0.195567	4.28987	1.79e-05	0.000627099
ADAMTS3	187.005	0.844829	0.2165	3.90221	9.53e-05	0.00231791
IDI1	4314.43	0.845137	0.175633	4.81195	1.49e-06	8.65e-05
NMRK1	536.428	0.845354	0.129468	6.52942	6.6e-11	2.35e-08
BCKDHB	969.88	0.850823	0.133811	6.35838	2.04e-10	6.22e-08
RMDN3	1387.51	0.851339	0.119093	7.14852	8.77e-13	5.75e-10
SRXN1	1806.22	0.852268	0.188648	4.51776	6.25e-06	0.0002756
PANK1	1382.3	0.853445	0.187821	4.54393	5.52e-06	0.000250529
SOD1	2631.67	0.855255	0.171665	4.98213	6.29e-07	4.29e-05
LOC486353	1125.89	0.855702	0.230518	3.71209	0.000205558	0.00412699
TMEM246	403.412	0.858298	0.220433	3.89369	9.87e-05	0.00238748
MAL2	3452.24	0.858629	0.174067	4.93276	8.11e-07	5.27e-05
ADH4	1696.32	0.859445	0.192748	4.45891	8.24e-06	0.000342212
EMID1	556.896	0.859942	0.179008	4.80393	1.56e-06	8.91e-05
PRR16	167.982	0.860742	0.214684	4.00935	6.09e-05	0.00164103
LANCL3	381.987	0.864111	0.207736	4.15967	3.19e-05	0.00100553
LOC102156972	298.596	0.865201	0.187486	4.61476	3.94e-06	0.000189282
HGF	422.032	0.868812	0.192269	4.51872	6.22e-06	0.000275358
PTGS1	911.87	0.871863	0.222957	3.91046	9.21e-05	0.00225095
BCLAF3	496.3	0.872517	0.226813	3.84686	0.000119641	0.00274009
TMEM63C	801.988	0.87403	0.203799	4.28868	1.8e-05	0.00062945
SFXN4	136.832	0.876485	0.169707	5.16469	2.41e-07	2.01e-05
ACSL5	1234.29	0.876543	0.197618	4.43554	9.18e-06	0.000369467
FDFT1	4015.55	0.880499	0.151953	5.79455	6.85e-09	1.09e-06
SLC6A9	537.878	0.882654	0.18873	4.67682	2.91e-06	0.000148373
BAG1	3121.25	0.891362	0.169992	5.24356	1.58e-07	1.43e-05
SLC27A4	2231.63	0.892741	0.154421	5.78121	7.42e-09	1.17e-06
CLEC14A	509.692	0.895319	0.258124	3.46856	0.000523258	0.0082447
PKIB	300.675	0.897649	0.23905	3.75507	0.000173294	0.00366628
IGFBP2	678.927	0.898713	0.256378	3.50543	0.000455878	0.00752548
TMC4	170.057	0.900528	0.221307	4.06913	4.72e-05	0.00135274
ERMP1	3160.75	0.900556	0.208159	4.32628	1.52e-05	0.000552543
WDR66	148.839	0.901326	0.255402	3.52904	0.000417067	0.00702458
LOC479911	1505.64	0.901922	0.140527	6.41814	1.38e-10	4.46e-08
TRIM54	65.2996	0.902021	0.228732	3.94358	8.03e-05	0.00203679
MCTP1	415.102	0.904572	0.242065	3.73689	0.000186308	0.00383661
SLC7A4	44.9203	0.90693	0.23189	3.91104	9.19e-05	0.00225002
HSF2BP	442.652	0.907721	0.135182	6.71478	1.88e-11	8.15e-09
RBM3	19076.3	0.908254	0.130644	6.95213	3.6e-12	1.95e-09
SRD5A3	1424.23	0.914737	0.204708	4.4685	7.88e-06	0.000330392
RAB3D	2526.01	0.919417	0.138744	6.6267	3.43e-11	1.4e-08
B2M	19203.6	0.91981	0.227142	4.04949	5.13e-05	0.00144463
FDPS	6763.31	0.921961	0.151173	6.09872	1.07e-09	2.27e-07
PLIN2	4880.03	0.926099	0.185623	4.98914	6.06e-07	4.2e-05
SAYSD1	109.869	0.927016	0.17635	5.25668	1.47e-07	1.36e-05
KIAA1211L	173.231	0.928969	0.228177	4.07126	4.68e-05	0.00134938
GLT1D1	143.332	0.92997	0.215862	4.30816	1.65e-05	0.000587924
MYD88	1999.31	0.930179	0.211394	4.40021	1.08e-05	0.000426959
LOC102156231	175.151	0.930341	0.204715	4.54456	5.5e-06	0.0002503
HMGCR	5826.57	0.931659	0.154672	6.02344	1.71e-09	3.3e-07
LOC491462	58.5212	0.934861	0.235742	3.96561	7.32e-05	0.0018998
CDKL3	284.172	0.935277	0.163318	5.72673	1.02e-08	1.51e-06
EBP	1338.24	0.93992	0.17038	5.51661	3.46e-08	4.25e-06
LOC102151917	218.914	0.940859	0.211145	4.45598	8.35e-06	0.00034559
IFT27	168.444	0.942705	0.225504	4.18043	2.91e-05	0.000939884
EPHA7	205.168	0.942995	0.25208	3.74085	0.000183397	0.00379834
AKAP5	933.765	0.944483	0.191088	4.94267	7.71e-07	5.05e-05
LOC106559154	35.2089	0.944661	0.232579	4.06168	4.87e-05	0.00138927
ACSL4	4119.19	0.944702	0.237244	3.98198	6.83e-05	0.00180828
RAB20	100.759	0.947085	0.198914	4.76127	1.92e-06	0.000105677
RSPH10B	41.5479	0.947267	0.248361	3.81408	0.000136692	0.00302497
TOX	70.8284	0.949034	0.235326	4.03284	5.51e-05	0.00151931
LOC611675	88.4547	0.95141	0.240198	3.96094	7.47e-05	0.00192809
ACAT2	3006.43	0.952194	0.160277	5.94091	2.83e-09	5.2e-07
LOC100685679	171.864	0.952879	0.205472	4.63751	3.53e-06	0.000172672
KRTDAP	43738	0.95363	0.257912	3.6975	0.000217731	0.00433919
HIGD1A	5362.51	0.955159	0.229278	4.16593	3.1e-05	0.000982587
STS	571.622	0.957425	0.257842	3.71322	0.000204635	0.00411227
ZC3H12A	347.602	0.957677	0.266392	3.59499	0.00032441	0.00585101
DDHD1	1089.04	0.958385	0.249664	3.8387	0.000123685	0.002807
LOC111098322	62.7789	0.960182	0.253869	3.7822	0.000155448	0.0033543
ZNF385B	258.886	0.963646	0.176142	5.47083	4.48e-08	5.24e-06
LOC490540	99.9898	0.964569	0.228695	4.2177	2.47e-05	0.000810565
PARP9	507.52	0.966506	0.251785	3.83862	0.000123729	0.002807
CYP27C1	267.526	0.968151	0.169457	5.71325	1.11e-08	1.61e-06
LOC610164	1935.93	0.96825	0.188055	5.14875	2.62e-07	2.15e-05
CYP4F22	3095.38	0.970017	0.229256	4.23116	2.32e-05	0.000776511
LOC486150	127.527	0.972715	0.283676	3.42896	0.000605895	0.00926741
LOC102152121	45.1535	0.976305	0.25615	3.81145	0.000138153	0.00305418
LYPD5	866.467	0.977961	0.240232	4.0709	4.68e-05	0.00134966
TMEM150C	879.053	0.979083	0.173985	5.62741	1.83e-08	2.49e-06
CYP2R1	228.196	0.980152	0.23927	4.09642	4.2e-05	0.00125256
TTC30A	95.622	0.982607	0.188534	5.21182	1.87e-07	1.64e-05
CEMIP	121.111	0.985114	0.284738	3.45973	0.000540723	0.00844363
LOC102156059	49.8539	0.986182	0.219506	4.49274	7.03e-06	0.000301937
SERPINB12	2983.3	0.986465	0.282202	3.4956	0.000473002	0.00770645
FHAD1	38.2679	0.987744	0.283885	3.47939	0.000502564	0.00802731
NCCRP1	1289.98	0.990592	0.24677	4.01424	5.96e-05	0.00161343
AHR	3872.38	0.993447	0.194132	5.11739	3.1e-07	2.48e-05
NINJ2	201.808	0.993484	0.250296	3.96924	7.21e-05	0.00187338
RNF225	454.162	0.994537	0.260348	3.82004	0.000133432	0.00297415
GALNT14	145.505	0.996956	0.280449	3.55486	0.000378181	0.0065167
SLC46A2	1487.47	0.997158	0.251845	3.95941	7.51e-05	0.00193128
WNK2	237.091	0.998518	0.230002	4.34135	1.42e-05	0.000524806
GALC	1866.23	0.999211	0.168967	5.91364	3.35e-09	6.04e-07
CYSRT1	440.587	1.00403	0.284711	3.5265	0.000421087	0.00708127
FGD3	132.57	1.00669	0.288987	3.48351	0.000494882	0.00793976
LOC106559849	26.1156	1.00671	0.28995	3.47203	0.000516539	0.00819008
RERG	974.486	1.00778	0.207749	4.85094	1.23e-06	7.39e-05
LOC111098966	214.416	1.01062	0.216276	4.67282	2.97e-06	0.000149885
TKT	6195.34	1.01167	0.14946	6.76885	1.3e-11	5.98e-09
HACD3	5069.28	1.01793	0.190215	5.35145	8.73e-08	8.78e-06
SQLE	5637.62	1.01961	0.161008	6.3327	2.41e-10	6.95e-08
THYN1	1764.14	1.02068	0.174294	5.8561	4.74e-09	8.2e-07
LOC609764	26.1898	1.02497	0.274068	3.73985	0.00018413	0.00380988
THBS2	4274.59	1.02623	0.281577	3.64457	0.000267835	0.00507817
DLX5	85.608	1.02625	0.24751	4.1463	3.38e-05	0.00105073
LDAH	2623.04	1.02959	0.161725	6.3663	1.94e-10	5.99e-08
LOC100685441	4682.82	1.03012	0.289698	3.55583	0.000376782	0.00650394
SCARB1	9170.36	1.03312	0.177143	5.83216	5.47e-09	9.18e-07
DNAJB5	109.504	1.03323	0.199769	5.17214	2.31e-07	1.95e-05
ELOVL4	13114.3	1.03382	0.268671	3.84791	0.00011913	0.00273265
RDH12	2875.23	1.03839	0.171937	6.03938	1.55e-09	3.03e-07
ARG2	271.336	1.03904	0.204634	5.07758	3.82e-07	2.92e-05
GRIP2	76.9224	1.04182	0.191102	5.45161	4.99e-08	5.72e-06
LOC102151736	3515.16	1.04263	0.278035	3.75	0.000176834	0.00370854
ANKRD66	44.0745	1.04547	0.296068	3.53119	0.000413698	0.00698413
DNAH3	87.261	1.04551	0.282083	3.70638	0.00021024	0.00420927
PTP4A3	62.2494	1.04701	0.266143	3.93403	8.35e-05	0.00208766
LOC491883	724.615	1.05012	0.235356	4.46181	8.13e-06	0.000338903
CSAD	462.18	1.05021	0.271572	3.86717	0.000110107	0.00259592
IQUB	132.5	1.05564	0.265132	3.98155	6.85e-05	0.00180933
SYN2	60.0964	1.05769	0.2565	4.12355	3.73e-05	0.00113568
CD80	130.535	1.05827	0.174953	6.04888	1.46e-09	2.95e-07
HSD17B2	2720.51	1.06077	0.172969	6.13274	8.64e-10	1.91e-07
LOC102154998	158.973	1.06109	0.215372	4.92675	8.36e-07	5.39e-05
GLRX	7407.31	1.06389	0.158156	6.72687	1.73e-11	7.82e-09
LOC102156877	57.9366	1.06461	0.306068	3.47835	0.000504518	0.0080407
RASL12	565.208	1.06737	0.240139	4.4448	8.8e-06	0.000357903
LOC102155472	49.2347	1.06941	0.265834	4.02284	5.75e-05	0.00156496
ANKS4B	195.25	1.07121	0.240545	4.45327	8.46e-06	0.000347992
CCT6B	30.2008	1.07158	0.268473	3.9914	6.57e-05	0.00175074
PNPLA3	7782.84	1.07183	0.24647	4.3487	1.37e-05	0.000510302
DESI1	2678.44	1.07365	0.193147	5.55872	2.72e-08	3.42e-06
REM2	218.814	1.0929	0.225828	4.83953	1.3e-06	7.67e-05
LY96	150.253	1.09668	0.30771	3.56401	0.000365232	0.00636963
LOC100686256	45.9816	1.09912	0.217505	5.05328	4.34e-07	3.23e-05
TGM5	1456.33	1.10084	0.210737	5.22376	1.75e-07	1.57e-05
TBX2	48.488	1.10113	0.284299	3.87313	0.000107446	0.00253871
SPINK2	251.567	1.10292	0.254655	4.33103	1.48e-05	0.000544494
LOC102153707	397.021	1.10707	0.270996	4.08518	4.4e-05	0.00128994
CPNE5	55.221	1.11076	0.309105	3.59347	0.000326304	0.00587479
ALDH3A1	39.6358	1.11468	0.326164	3.41753	0.000631921	0.0095775
C1QC	646.866	1.11481	0.291937	3.81867	0.000134173	0.00298755
RIMS1	205.719	1.11578	0.321871	3.46654	0.000527199	0.00827549
LOC111095942	40.1777	1.11843	0.308565	3.62463	0.00028938	0.00536679
MAP7D2	713.714	1.12138	0.27026	4.14928	3.34e-05	0.00104312
AQP3	9567.71	1.12851	0.223604	5.04691	4.49e-07	3.33e-05
TRIM14	767.237	1.13055	0.184164	6.13883	8.31e-10	1.85e-07
HOGA1	74.0646	1.13306	0.291101	3.89232	9.93e-05	0.00239837
RDH16	988.464	1.13534	0.226132	5.02068	5.15e-07	3.74e-05
MELTF	103.416	1.13647	0.199422	5.69884	1.21e-08	1.72e-06
LOC102155417	154.456	1.13706	0.263611	4.3134	1.61e-05	0.000577672
WFDC5	553.191	1.13809	0.317211	3.58779	0.000333488	0.00595518
MGLL	14699.9	1.13858	0.219493	5.18732	2.13e-07	1.82e-05
MVD	2118.16	1.14051	0.207082	5.50754	3.64e-08	4.42e-06
SOAT1	14507.8	1.14363	0.253324	4.51448	6.35e-06	0.000278652
LGR6	336.586	1.14495	0.328854	3.48163	0.000498364	0.00798378
LOC102153976	58.1878	1.14611	0.248204	4.61759	3.88e-06	0.000187711
EPOP	192.885	1.14713	0.218009	5.26185	1.43e-07	1.33e-05
CRAT	5048.02	1.14738	0.202995	5.65223	1.58e-08	2.18e-06
CNKSR2	23.4157	1.1481	0.307567	3.73286	0.000189316	0.00388007
ELOVL3	5267.14	1.14951	0.239661	4.79641	1.62e-06	9.2e-05
KCTD14	60.6904	1.15033	0.271686	4.23406	2.3e-05	0.000770122
TMEM210	21.5433	1.15305	0.334939	3.44257	0.000576224	0.00890165
LOC102157048	1509.58	1.15469	0.241715	4.77706	1.78e-06	9.9e-05
LOC102151633	279.793	1.1575	0.239156	4.83994	1.3e-06	7.67e-05
LOC111094464	34.4089	1.16087	0.273442	4.24542	2.18e-05	0.000741328
DGAT2L6	379.77	1.1622	0.308503	3.76722	0.000165078	0.00351653
LOC102153203	50.8716	1.16841	0.286479	4.07854	4.53e-05	0.00132011
ELMOD1	1108.48	1.16941	0.249232	4.69205	2.7e-06	0.000139384
C12H6orf15	2174.73	1.17317	0.242196	4.84388	1.27e-06	7.57e-05
LOC111097330	34.5493	1.1733	0.240169	4.88529	1.03e-06	6.35e-05
PLA2G4E	1799.79	1.1763	0.167893	7.00622	2.45e-12	1.43e-09
NAMPT	4226.48	1.17669	0.178618	6.58776	4.47e-11	1.76e-08
DDX60	240.764	1.17747	0.267444	4.40268	1.07e-05	0.000423831
VTN	78.2931	1.17882	0.256533	4.59522	4.32e-06	0.000205182
HAL	2948.87	1.18807	0.304657	3.8997	9.63e-05	0.00233688
LOC111093305	39.5734	1.18845	0.317051	3.74846	0.000177926	0.00372422
P2RX1	64.5264	1.19083	0.341222	3.4899	0.000483208	0.00781753
GK5	13473.3	1.19137	0.218406	5.45485	4.9e-08	5.67e-06
LOC102152955	25.9487	1.20627	0.310337	3.88697	0.000101501	0.00243012
LOC111098596	31.6859	1.207	0.24251	4.97711	6.45e-07	4.35e-05
LOC111091716	17.4885	1.20856	0.328489	3.67915	0.000234014	0.00460014
LOC612207	95.7047	1.21096	0.351809	3.44209	0.000577239	0.00891097
SPHKAP	338.605	1.21378	0.338878	3.58177	0.000341278	0.00606426
CERS4	2013.44	1.21704	0.244097	4.98592	6.17e-07	4.24e-05
LOC111091659	22.8064	1.21879	0.33026	3.6904	0.000223904	0.00444175
IPCEF1	570.403	1.21984	0.293929	4.15014	3.32e-05	0.00104073
LOC100683724	73.3199	1.22012	0.21236	5.74553	9.16e-09	1.39e-06
LOC106557526	61.0034	1.22853	0.334758	3.66992	0.000242631	0.00471811
LOC100684379	83.3018	1.22981	0.27057	4.54524	5.49e-06	0.000250025
CYP4B1	168.104	1.2311	0.351696	3.50047	0.000464436	0.00763234
HAAO	88.968	1.23174	0.281785	4.37121	1.24e-05	0.000474159
GPX2	1758.52	1.2365	0.230098	5.37381	7.71e-08	7.95e-06
SC5D	2794.97	1.23699	0.145621	8.49462	1.99e-17	3.44e-14
ACTA2	3373.01	1.23958	0.335879	3.69057	0.000223755	0.00444175
ZMYND15	13.0486	1.24116	0.36156	3.4328	0.000597386	0.00916967
ENPEP	396.767	1.24907	0.240628	5.19088	2.09e-07	1.79e-05
STAC3	192.926	1.25427	0.218082	5.75137	8.85e-09	1.35e-06
LOC100685511	479.466	1.2641	0.361654	3.49532	0.000473493	0.00770645
GRK1	31.7877	1.26594	0.345992	3.65887	0.000253327	0.00487674
LOC111096286	19.2375	1.26615	0.344288	3.67758	0.000235455	0.00462008
LOC102156106	421.323	1.26872	0.258647	4.90522	9.33e-07	5.92e-05
SGCA	256.11	1.26938	0.238211	5.32881	9.89e-08	9.68e-06
TMEM229A	803.744	1.27061	0.197601	6.43017	1.27e-10	4.18e-08
CCDC3	4419.04	1.27072	0.149674	8.48991	2.07e-17	3.44e-14
SLC22A18	28.3414	1.2708	0.282004	4.50632	6.6e-06	0.000287251
ANKRD23	157.265	1.27214	0.336616	3.7792	0.000157333	0.00338148
NLRC5	459.096	1.27753	0.265481	4.81213	1.49e-06	8.65e-05
OAS2	1003.26	1.27925	0.360128	3.55219	0.000382033	0.00656217
CA14	47.1874	1.28339	0.36327	3.53289	0.000411046	0.00695449
AWAT1	4593.21	1.28369	0.317785	4.03951	5.36e-05	0.00148991
ABHD1	284.764	1.28594	0.290169	4.4317	9.35e-06	0.000374719
KRT79	19169.9	1.28949	0.308946	4.17384	3e-05	0.000958939
RAD51AP2	24.7141	1.29602	0.302049	4.29074	1.78e-05	0.000625667
TMEM144	810.495	1.30747	0.293883	4.44895	8.63e-06	0.000353042
CYP2J2	3632.87	1.31031	0.326794	4.00958	6.08e-05	0.00164103
PNPLA5	3050.78	1.31146	0.279049	4.69975	2.6e-06	0.000134545
STYK1	31.7324	1.31524	0.329665	3.98963	6.62e-05	0.00176167
ARHGEF33	102.675	1.32377	0.215996	6.12868	8.86e-10	1.94e-07
LHB	18.3677	1.32541	0.367857	3.60305	0.000314507	0.00573935
MMP13	55.8527	1.32877	0.358623	3.70519	0.000211232	0.00422523
SNX10	578.23	1.33756	0.268459	4.98237	6.28e-07	4.29e-05
LOC111095227	66.9868	1.33919	0.384214	3.48552	0.000491185	0.00790976
CLEC5A	139.998	1.34185	0.345161	3.8876	0.000101241	0.00243012
LOC111092179	37.8832	1.34579	0.261923	5.13813	2.77e-07	2.25e-05
SOAT2	470.245	1.34594	0.306971	4.38458	1.16e-05	0.000453185
RASSF6	1037.76	1.34945	0.226694	5.95273	2.64e-09	4.96e-07
LOC111093324	14.056	1.35075	0.330593	4.08583	4.39e-05	0.00128994
LOC488622	417.274	1.35546	0.336961	4.02261	5.76e-05	0.00156496
LOC111089962	59.5854	1.36194	0.319578	4.26166	2.03e-05	0.000693778
CSTA	1548.66	1.36287	0.343965	3.96224	7.42e-05	0.00191994
PEX3	2205.02	1.37086	0.15043	9.11294	8.02e-20	2.17e-16
LHFPL4	72.1606	1.3732	0.268672	5.11105	3.2e-07	2.56e-05
LOC111091730	142.389	1.37367	0.328988	4.17543	2.97e-05	0.000957898
TRIB3	50.9923	1.37489	0.263741	5.21303	1.86e-07	1.63e-05
SLC14A1	138.876	1.38026	0.276217	4.99702	5.82e-07	4.05e-05
SLC37A2	1896.51	1.38063	0.251264	5.49472	3.91e-08	4.73e-06
SLC16A14	827.633	1.38295	0.273308	5.06005	4.19e-07	3.13e-05
LOC111092015	30.5643	1.38352	0.372162	3.71753	0.000201182	0.00406933
FAR2	2928.08	1.38605	0.29946	4.62851	3.68e-06	0.000179535
TRIM69	21.5655	1.38607	0.340577	4.06977	4.71e-05	0.00135274
LOC102152760	22.3439	1.39251	0.383204	3.63387	0.0002792	0.00522727
CHI3L1	89.6747	1.39301	0.353856	3.93667	8.26e-05	0.00207925
IFGGB2	129.363	1.39519	0.340956	4.09198	4.28e-05	0.0012698
GPR65	72.016	1.40716	0.382798	3.676	0.000236918	0.00463619
MYOM3	100.998	1.41049	0.352567	4.00062	6.32e-05	0.00169435
LOC102155961	32.0634	1.4105	0.412305	3.42102	0.000623866	0.00949531
RPSA	251.61	1.41286	0.290958	4.85587	1.2e-06	7.29e-05
ANKRD2	60.4046	1.4164	0.276037	5.1312	2.88e-07	2.33e-05
LOC610304	425.346	1.41662	0.230038	6.1582	7.36e-10	1.66e-07
ST8SIA6	450.131	1.42761	0.248097	5.75425	8.7e-09	1.34e-06
LOC100684040	18.4985	1.4281	0.413754	3.45156	0.000557353	0.00867202
LOC102154244	28.7825	1.43277	0.34995	4.09421	4.24e-05	0.00125937
EREG	300.38	1.43577	0.23653	6.07014	1.28e-09	2.63e-07
TMEM198	22.7448	1.43923	0.325569	4.42067	9.84e-06	0.000392919
LOC102151751	198.099	1.44242	0.300589	4.79865	1.6e-06	9.12e-05
CGREF1	276.995	1.44375	0.259464	5.56436	2.63e-08	3.37e-06
LOC111090285	18.3714	1.44404	0.411706	3.50746	0.000452406	0.0074858
LOC612290	467.92	1.44498	0.275551	5.24396	1.57e-07	1.43e-05
LOC106558971	56.2129	1.45539	0.309523	4.70204	2.58e-06	0.000133366
PLA2G3	411.392	1.45573	0.214029	6.80157	1.03e-11	4.98e-09
LOC102152843	105.796	1.45914	0.236103	6.18011	6.41e-10	1.48e-07
CLCA2	2826.14	1.4668	0.196243	7.4744	7.76e-14	6.46e-11
LOC102151965	106.516	1.46994	0.35939	4.0901	4.31e-05	0.00127315
CNGA1	74.1096	1.47527	0.408015	3.61572	0.000299517	0.00551228
LOC111092942	29.105	1.47646	0.390532	3.78065	0.000156421	0.00336858
LOC106559102	8.00355	1.48255	0.4321	3.43104	0.00060127	0.00920968
CA6	310.63	1.4827	0.362808	4.08674	4.37e-05	0.0012882
DCST1	123.597	1.48835	0.303847	4.89836	9.66e-07	6.06e-05
AHRR	159.064	1.49278	0.308098	4.84515	1.27e-06	7.54e-05
SLC11A1	171.837	1.49379	0.376763	3.9648	7.35e-05	0.00190404
CASP14	13065.2	1.49611	0.319094	4.68862	2.75e-06	0.000141065
LOC102156864	65.3319	1.4964	0.227147	6.58781	4.46e-11	1.76e-08
HOXA9	115.287	1.49707	0.376158	3.9799	6.89e-05	0.00181748
LOC476620	84.5471	1.49992	0.347163	4.32051	1.56e-05	0.000564355
CEND1	16.5682	1.50214	0.407897	3.68265	0.000230823	0.00454155
LOC111091339	107.697	1.5045	0.255532	5.8877	3.92e-09	7e-07
ROPN1L	21.4926	1.5088	0.328919	4.58717	4.49e-06	0.000210482
NOD2	223.798	1.50988	0.246971	6.11359	9.74e-10	2.09e-07
ACTG2	4631.54	1.51376	0.354554	4.26949	1.96e-05	0.000675215
STX11	294.984	1.52506	0.376075	4.05519	5.01e-05	0.00141536
RAB26	48.3105	1.5267	0.350383	4.35722	1.32e-05	0.00049841
RIPPLY3	54.6779	1.53113	0.293625	5.21455	1.84e-07	1.63e-05
SLC6A17	346.944	1.53657	0.320464	4.79483	1.63e-06	9.25e-05
NR4A1	313.891	1.53717	0.378454	4.06171	4.87e-05	0.00138927
CARNS1	103.112	1.541	0.326634	4.71783	2.38e-06	0.00012707
GLP1R	467.741	1.54111	0.414779	3.7155	0.000202802	0.00408681
PDZD7	115.146	1.54731	0.434396	3.56199	0.000368058	0.00639316
LOC100685656	16.3467	1.54842	0.449325	3.44611	0.000568708	0.00882009
LOC111096329	14.8416	1.55466	0.441609	3.52044	0.000430824	0.00721138
LOC102155159	49.3564	1.56076	0.387412	4.02868	5.61e-05	0.0015367
CCL20	131.17	1.56283	0.424371	3.6827	0.000230776	0.00454155
LOC111091231	133.722	1.57432	0.309458	5.08734	3.63e-07	2.83e-05
POU2F2	19.6686	1.57453	0.451173	3.48985	0.00048329	0.00781753
FA2H	5232.92	1.57543	0.361185	4.36182	1.29e-05	0.000490622
LOC111093779	23.011	1.57752	0.447738	3.52332	0.000426181	0.00715211
DAW1	12.3484	1.57925	0.422515	3.73775	0.000185678	0.00383091
LOC111092855	12.6655	1.57954	0.435824	3.62425	0.000289798	0.00536995
SLC6A20	48.8973	1.58347	0.444968	3.5586	0.000372833	0.00645537
OAS3	204.531	1.59499	0.358816	4.44515	8.78e-06	0.000357903
LOC102155886	212.208	1.60529	0.307495	5.22053	1.78e-07	1.6e-05
TTLL9	34.1375	1.60816	0.367255	4.37887	1.19e-05	0.000462228
LOC102156919	22.0255	1.61859	0.358524	4.5146	6.34e-06	0.000278652
MASP1	332.844	1.6262	0.30504	5.33109	9.76e-08	9.6e-06
TPM2	2406.56	1.63216	0.35382	4.61297	3.97e-06	0.000190495
GGCT	2800.35	1.63728	0.294412	5.56119	2.68e-08	3.39e-06
TRIM67	35.4917	1.63864	0.388023	4.22305	2.41e-05	0.000796378
SLITRK4	102.713	1.63906	0.360875	4.54191	5.57e-06	0.000250841
LOC606863	160.163	1.64593	0.377682	4.35796	1.31e-05	0.00049759
LOC102155357	15.0248	1.64603	0.370822	4.43885	9.04e-06	0.000365866
LOC111098320	27.282	1.64711	0.324032	5.08315	3.71e-07	2.86e-05
UNC79	136.476	1.64711	0.443397	3.71475	0.000203407	0.0040952
MMP9	210.723	1.65499	0.482321	3.4313	0.000600689	0.0092073
PTPRZ1	208.73	1.6578	0.272444	6.08494	1.17e-09	2.43e-07
TFCP2L1	195.204	1.66045	0.327751	5.06618	4.06e-07	3.07e-05
LOC111098316	26.233	1.66285	0.345629	4.81108	1.5e-06	8.66e-05
LOC106559709	27.3513	1.66951	0.367531	4.54251	5.56e-06	0.000250766
LOC100684769	130.789	1.67125	0.381733	4.37807	1.2e-05	0.000462764
LOC607806	214.615	1.67299	0.437895	3.82053	0.000133163	0.00297415
LOC111098227	18.4777	1.68587	0.415995	4.05262	5.06e-05	0.00142728
LOC111096784	30.7	1.69526	0.432692	3.91793	8.93e-05	0.00220159
FADS6	346.529	1.72443	0.293261	5.88018	4.1e-09	7.21e-07
LOC106558069	26.598	1.74111	0.354114	4.9168	8.8e-07	5.65e-05
LOC488636	119.627	1.74181	0.399134	4.36396	1.28e-05	0.000487553
LOC102155962	862.11	1.74229	0.254832	6.83701	8.09e-12	4.07e-09
LOC102155121	13.911	1.74323	0.396808	4.39314	1.12e-05	0.000438059
LOC106557449	15.6786	1.745	0.423744	4.11805	3.82e-05	0.00115401
NOS2	210.927	1.74705	0.321176	5.43953	5.34e-08	5.96e-06
SLC17A7	14.8804	1.75002	0.495688	3.53049	0.000414795	0.0069972
SFTPC	11.0587	1.75447	0.467298	3.75449	0.000173692	0.00367111
CAMKV	52.0095	1.75494	0.451516	3.88678	0.000101582	0.00243012
RIPOR2	426.494	1.75515	0.490567	3.57781	0.000346489	0.00613671
LOC111091377	10.0498	1.77191	0.462384	3.83212	0.000127042	0.00286414
LRCOL1	38.578	1.77522	0.516102	3.43966	0.000582449	0.0089722
SYT8	352.768	1.78646	0.377669	4.73022	2.24e-06	0.000120147
SIGLEC1	200.732	1.79256	0.461363	3.88537	0.000102176	0.00243815
CDH15	41.8084	1.7979	0.371619	4.83801	1.31e-06	7.71e-05
LOC102152333	14.3684	1.80241	0.520725	3.46135	0.000537471	0.00840497
LOC111092089	32.5214	1.80242	0.385981	4.66971	3.02e-06	0.000150517
LOC102155864	20.7319	1.80336	0.500238	3.60502	0.000312135	0.00570087
LOC111091720	18.6557	1.80564	0.478773	3.77139	0.00016234	0.00346843
ASAH2	180.026	1.80573	0.324671	5.56172	2.67e-08	3.39e-06
CCDC116	124.503	1.80989	0.373112	4.8508	1.23e-06	7.39e-05
IFI44	1365.32	1.80992	0.335421	5.39598	6.82e-08	7.23e-06
DNASE1	43.2852	1.81532	0.366584	4.95198	7.35e-07	4.85e-05
SULT4A1	45.0114	1.82108	0.418919	4.3471	1.38e-05	0.000512995
LOC111093501	13.6312	1.83377	0.461297	3.97526	7.03e-05	0.00184251
C9H17orf64	593.368	1.83554	0.36476	5.03218	4.85e-07	3.56e-05
IL36B	841.945	1.84636	0.305638	6.04099	1.53e-09	3.03e-07
TMEM156	22.9124	1.85094	0.467448	3.95966	7.51e-05	0.00193128
LOC102156409	79.5593	1.86721	0.236642	7.89045	3.01e-15	3.62e-12
CRLF1	183.238	1.86756	0.333726	5.59608	2.19e-08	2.92e-06
SLC6A13	279.105	1.87315	0.408111	4.5898	4.44e-06	0.000208291
LOC106558385	35.7533	1.87474	0.482158	3.88823	0.000100977	0.00243012
NQO1	10584.8	1.89018	0.198505	9.52209	1.7e-21	6.12e-18
LOC102155349	132.87	1.89071	0.30465	6.20618	5.43e-10	1.29e-07
LOC102151307	5.37519	1.89326	0.553634	3.41969	0.000626924	0.00952176
SLAMF9	113.141	1.89372	0.34501	5.48888	4.04e-08	4.86e-06
NRIP3	248.73	1.89481	0.313792	6.03843	1.56e-09	3.03e-07
TREX2	160.245	1.90079	0.436773	4.3519	1.35e-05	0.000507622
GFAP	43.9465	1.91847	0.449293	4.26997	1.95e-05	0.00067482
PGLYRP2	12.0712	1.92335	0.471899	4.07577	4.59e-05	0.00133176
LOC609690	115.037	1.92745	0.517119	3.72727	0.000193561	0.00395212
CDRT1	87.52	1.93915	0.335833	5.77415	7.73e-09	1.2e-06
LOC111093331	18.3422	1.94481	0.446223	4.35838	1.31e-05	0.000497515
FGFBP1	4001.45	1.94735	0.275759	7.06179	1.64e-12	1.02e-09
DUOX2	52.1424	1.96886	0.286072	6.88242	5.88e-12	3.03e-09
TCF24	6.75155	1.97783	0.560376	3.52946	0.000416406	0.0070189
TDRD5	8.91553	1.97954	0.458323	4.31909	1.57e-05	0.000566084
LOC102152749	28.9666	1.99107	0.435821	4.56855	4.91e-06	0.000228095
LOC111090049	9.32483	1.99952	0.451581	4.42782	9.52e-06	0.000380817
SLC23A1	81.3763	2.00309	0.272184	7.35932	1.85e-13	1.38e-10
LOC106558014	17.0214	2.00542	0.579005	3.46356	0.00053307	0.00835426
UPP1	1274.81	2.01023	0.383115	5.24707	1.55e-07	1.41e-05
LGALS9	585.216	2.01626	0.383776	5.25374	1.49e-07	1.37e-05
PLA2G4D	370.799	2.02553	0.311189	6.50901	7.56e-11	2.64e-08
LOC100682872	44.0141	2.02812	0.39292	5.16165	2.45e-07	2.04e-05
LOC111094799	57.7887	2.03002	0.382654	5.30512	1.13e-07	1.08e-05
XAF1	53.0843	2.03246	0.468584	4.33744	1.44e-05	0.000532403
LOC102152608	30.599	2.04513	0.441579	4.63141	3.63e-06	0.000177438
COL22A1	6.84583	2.04674	0.554741	3.68955	0.000224654	0.00445255
PHEX	60.0355	2.04992	0.3667	5.59019	2.27e-08	2.99e-06
USP18	182.833	2.05149	0.434337	4.72327	2.32e-06	0.000124024
LRG1	83.0719	2.05288	0.542901	3.78131	0.000156005	0.00336297
C18H11orf91	5.55238	2.0553	0.591855	3.47264	0.000515363	0.00818342
KLK9	555.475	2.05605	0.379769	5.41396	6.16e-08	6.67e-06
LOC100855449	115.521	2.05781	0.424177	4.8513	1.23e-06	7.39e-05
CMPK2	486.108	2.08051	0.410727	5.06542	4.07e-07	3.07e-05
LOC611500	45.6708	2.09744	0.453668	4.62329	3.78e-06	0.000183283
UPK3BL2	26.4141	2.0989	0.480696	4.36638	1.26e-05	0.00048304
PRG4	169.431	2.10399	0.504502	4.17042	3.04e-05	0.000969108
LOC111094680	56.0837	2.11034	0.342554	6.1606	7.25e-10	1.65e-07
LOC111097504	5.87664	2.11568	0.593951	3.56205	0.000367969	0.00639316
MX2	219.589	2.12751	0.448689	4.74162	2.12e-06	0.000115007
LOC111093740	17.9605	2.13249	0.593098	3.59551	0.000323752	0.00584401
LOC102156036	21.4239	2.155	0.468291	4.60184	4.19e-06	0.000199634
LOC111096022	103.608	2.16612	0.318195	6.80753	9.93e-12	4.88e-09
LOC102151797	10.9317	2.17894	0.479	4.54894	5.39e-06	0.000247234
TTC24	47.3116	2.18231	0.484679	4.50258	6.71e-06	0.00029017
LOC100685491	29.2218	2.18878	0.635972	3.44163	0.000578219	0.00891974
DNAJC5B	59.0608	2.1958	0.60049	3.65668	0.000255505	0.00489805
PTGS2	93.5665	2.19746	0.586663	3.74569	0.000179898	0.003751
LOC106558654	18.6918	2.2154	0.441522	5.01764	5.23e-07	3.76e-05
FAM3D	50.9819	2.23345	0.375705	5.9447	2.77e-09	5.17e-07
CRYBA2	7.5095	2.2377	0.611648	3.65847	0.000253722	0.00487683
LOC102151790	12.3776	2.24866	0.523202	4.29787	1.72e-05	0.000611843
S100P	146.942	2.26206	0.474061	4.77167	1.83e-06	0.000101132
SLURP1	355.089	2.26292	0.453875	4.98577	6.17e-07	4.24e-05
LOC488947	76.8256	2.2699	0.58283	3.89461	9.84e-05	0.00238114
NUGGC	16.3738	2.27316	0.425445	5.34302	9.14e-08	9.12e-06
LYNX1	1388.03	2.27501	0.322787	7.04802	1.81e-12	1.09e-09
LOC111090520	24.3126	2.28479	0.366075	6.24132	4.34e-10	1.06e-07
ASIC1	147.575	2.2849	0.401657	5.68867	1.28e-08	1.79e-06
DNAJC5G	11.0377	2.29471	0.553355	4.14691	3.37e-05	0.00104944
STAR	5.1396	2.30192	0.616432	3.73427	0.000188263	0.00386582
C20H19orf38	83.34	2.30636	0.37076	6.22063	4.95e-10	1.19e-07
LOC483954	38.0842	2.32491	0.508892	4.56857	4.91e-06	0.000228095
EPB42	16.4256	2.33188	0.50787	4.59149	4.4e-06	0.000207573
LOC612019	46.2748	2.3728	0.425406	5.57773	2.44e-08	3.16e-06
LOC610073	6.41887	2.38845	0.639735	3.7335	0.00018884	0.003874
ZBP1	56.76	2.39431	0.574708	4.16613	3.1e-05	0.000982587
IL18RAP	36.0052	2.4051	0.63858	3.76633	0.000165667	0.0035256
TBPL2	12.9245	2.40528	0.457808	5.25391	1.49e-07	1.37e-05
HSD3B2	154.717	2.40649	0.345426	6.96673	3.24e-12	1.82e-09
LOC102154795	6.94123	2.43763	0.56102	4.345	1.39e-05	0.000517051
APOC1	3003.2	2.44581	0.389168	6.28472	3.28e-10	8.56e-08
LOC100685620	615.623	2.53143	0.655118	3.86408	0.000111506	0.00262034
TMPRSS11D	27.387	2.54525	0.685449	3.71326	0.000204606	0.00411227
LOC608975	200.97	2.58409	0.676141	3.82181	0.000132474	0.00296804
JPH4	864.952	2.59416	0.238279	10.8871	1.33e-27	9.58e-24
LOC111094271	5.66553	2.61437	0.748195	3.49423	0.000475426	0.00772316
LOC477540	240.344	2.62409	0.474775	5.52701	3.26e-08	4.05e-06
CFHR5	58.1553	2.65318	0.573637	4.62519	3.74e-06	0.00018202
APOA4	4.53665	2.66057	0.731457	3.63735	0.000275455	0.00517344
PYGM	103.01	2.6927	0.719713	3.74135	0.000183033	0.00379591
KMO	12.9048	2.69794	0.733749	3.67692	0.00023607	0.0046271
LOC607095	3564.35	2.70463	0.680375	3.9752	7.03e-05	0.00184251
LOC102155585	453.422	2.71957	0.705878	3.85275	0.000116799	0.00269901
MX1	801.022	2.7469	0.616297	4.4571	8.31e-06	0.000344446
FGF19	6.02446	2.78199	0.613178	4.53701	5.71e-06	0.000255674
SIGLEC15	43.2404	2.81704	0.321652	8.75803	1.99e-18	4.78e-15
SLC5A5	31.4656	2.83376	0.743743	3.81014	0.000138887	0.00306729
LOC106557996	22.7018	2.83773	0.486921	5.8279	5.61e-09	9.34e-07
LOC111094421	11.4503	2.86479	0.616885	4.64397	3.42e-06	0.000168502
CXCL8	54.8891	2.86652	0.533963	5.36838	7.94e-08	8.15e-06
CHRM4	15.6095	2.87862	0.682782	4.21601	2.49e-05	0.000814174
LOC100683099	181.978	2.88785	0.399868	7.222	5.12e-13	3.58e-10
ATP4A	9.80112	2.90756	0.804423	3.61446	0.000300973	0.00552967
LOC102152345	5.12178	2.93205	0.803329	3.64987	0.000262371	0.00500771
LOC111098805	7.48331	2.95741	0.594135	4.97767	6.44e-07	4.35e-05
MYOZ3	11.129	2.95936	0.699831	4.22868	2.35e-05	0.000782697
IL36G	1019.4	2.97403	0.348443	8.53522	1.4e-17	2.75e-14
MIR147	30.9824	2.97967	0.659112	4.52073	6.16e-06	0.000273874
LOC111096586	10.0702	2.98077	0.702338	4.24407	2.2e-05	0.000743449
HSH2D	6.40793	3.02585	0.61815	4.89502	9.83e-07	6.11e-05
SLC27A2	4.22977	3.03383	0.863147	3.51485	0.000439997	0.00731964
LOC102157062	49.3746	3.05454	0.465737	6.55851	5.43e-11	2.06e-08
ISG20	53.1197	3.06308	0.614869	4.98169	6.3e-07	4.29e-05
LOC482194	28.7106	3.12916	0.43977	7.11544	1.12e-12	7.1e-10
RAPSN	68.8464	3.15038	0.390963	8.058	7.76e-16	9.87e-13
A2ML1	118.644	3.18973	0.48852	6.52937	6.6e-11	2.35e-08
LOC102151415	30.8001	3.20078	0.511476	6.25793	3.9e-10	9.71e-08
LOC111090838	5.53661	3.20533	0.843792	3.79872	0.000145443	0.00318928
SPINK7	259.195	3.28322	0.521673	6.29363	3.1e-10	8.45e-08
LOC111098625	5.37917	3.30219	0.81753	4.03923	5.36e-05	0.00148991
LOC474938	366.819	3.31401	0.333989	9.92251	3.32e-23	1.44e-19
LOC111098010	18.8698	3.34269	0.532734	6.27459	3.51e-10	8.93e-08
MZB1	11.7174	3.40096	0.663799	5.12347	3e-07	2.41e-05
MEFV	20.7891	3.50687	0.817086	4.29193	1.77e-05	0.00062479
ADGRE3	82.4289	3.51611	1.00414	3.50159	0.000462488	0.00761767
ACTN2	18.1635	3.54047	0.879116	4.02731	5.64e-05	0.00154372
CLEC12B	2.3676	3.64405	1.03945	3.50576	0.0004553	0.00752548
LOC476718	39.6315	3.64514	0.959545	3.79882	0.000145388	0.00318928
SLC13A3	28.9487	3.66295	0.527773	6.94038	3.91e-12	2.06e-09
ODAPH	21.5355	3.69355	0.773202	4.77695	1.78e-06	9.9e-05
LOC111090690	2.65553	3.76523	1.07058	3.517	0.000436453	0.00727187
TMEM233	9.31465	3.92237	0.712123	5.50799	3.63e-08	4.42e-06
LOC111092282	76.121	3.93514	0.875374	4.49538	6.94e-06	0.000298817
LOC100686711	28.5643	3.94768	0.830987	4.75059	2.03e-06	0.000110295
MYLPF	212.47	4.00845	1.0395	3.85615	0.000115187	0.00267489
RSAD2	84.1991	4.05713	0.619355	6.55057	5.73e-11	2.14e-08
BPIFA1	5.65969	4.06705	0.83026	4.89852	9.66e-07	6.06e-05
LOC111093521	7.18626	4.11127	0.949265	4.331	1.48e-05	0.000544494
PAH	4.78311	4.12518	1.04702	3.93992	8.15e-05	0.00205848
GDAP1	2.67711	4.1303	1.17203	3.52407	0.000424974	0.00714108
LOC111091809	14.8493	4.18289	0.730657	5.72483	1.04e-08	1.51e-06
LOC102152627	366.475	4.2749	0.32713	13.0679	5.02e-39	5.43e-35
ADAM2	1.94934	4.29999	1.1292	3.80801	0.000140092	0.00308759
BHMT2	7.14278	4.40309	0.868181	5.07163	3.94e-07	3e-05
LOC111094960	2.64432	4.4127	1.2414	3.55462	0.000378521	0.00651737
MYH3	8.75088	4.55485	1.22462	3.71941	0.000199688	0.00404668
CANF2	8.851	4.69118	1.26965	3.69486	0.00022001	0.00437654
LOC611632	2397.79	4.6968	0.70662	6.64685	2.99e-11	1.25e-08
S100A8	3280.48	4.74976	0.727459	6.52925	6.61e-11	2.35e-08
TRDN	12.8535	4.77538	0.981698	4.86441	1.15e-06	7e-05
ACTA1	909.707	4.99196	0.999016	4.99687	5.83e-07	4.05e-05
LOC481834	188.756	5.079	1.13074	4.49174	7.06e-06	0.000302164
LOC111097601	7.94561	5.08019	1.13606	4.47177	7.76e-06	0.000326646
S100A12	1187.41	5.15137	0.891696	5.77705	7.6e-09	1.19e-06
SLC7A10	4.97348	5.22536	1.09962	4.75197	2.01e-06	0.000109822
S100A9	3250.16	5.37673	0.806014	6.67076	2.54e-11	1.08e-08
LOC482436	351.117	5.65131	1.20003	4.70931	2.49e-06	0.000130207
CASQ1	14.6069	5.65879	1.51925	3.72474	0.000195518	0.00398344
LOC612036	206.968	5.6895	1.0819	5.25879	1.45e-07	1.35e-05
SMIM2	7.29012	5.7493	0.949859	6.0528	1.42e-09	2.91e-07
KRT2	51656.6	6.98311	0.423432	16.4917	4.21e-61	9.11e-57
